# Supplementary material for: Astrocyte GluN2C NMDA receptors control basal synaptic strengths of hippocampal CA1 pyramidal neurons in the stratum radiatum
Source: eLife journal article supplement (doi:10.7554/elife.70818), 2021-10-25
Supplement: supp [file elife-70818-supp-v1.zip]

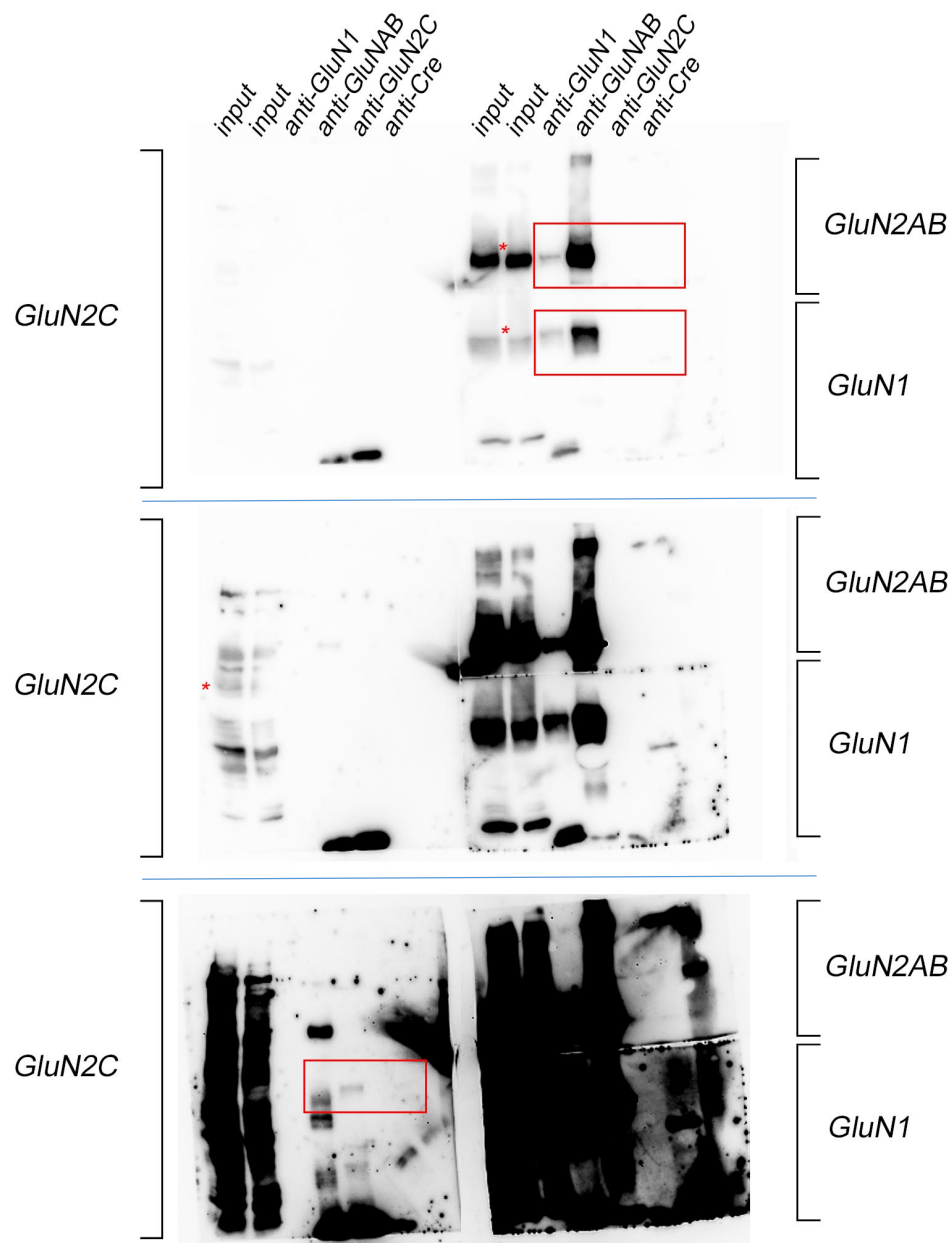

#### Source Western Blot for Figure 4D.

Top, Middle and Bottom panels show the same three SDS-PAGE gels processed for western blotting with increasing gel exposure times. Each panel contains a blot against GluN2C (left), GluN2AB (right top), GluN1 (right bottom) following immunoprecipitations against the antibodies indicated on top. Asterix indicates the input bands and the boxed area corresponds to the respective bands of the blot shown in Figure 4D.
