# Supplementary material for: Astrocyte GluN2C NMDA receptors control basal synaptic strengths of hippocampal CA1 pyramidal neurons in the stratum radiatum
Source: eLife journal article supplement (doi:10.7554/elife.70818), 2021-10-25
Supplement: supp [file elife-70818-supp-v1.zip]

Archive with 18 entries (18 files):
- elife_poa_e70818_Transparent_Reporting_File.docx
- elife_poa_e70818_Figure_1_figure_supplement_1.tif
- elife_poa_e70818_Figure_1_figure_supplement_2.tif
- elife_poa_e70818_Figure_1_figure_supplement_3.tif
- elife_poa_e70818_Figure_1_figure_supplement_4.tif
- elife_poa_e70818_Figure_1_figure_supplement_5.tif
- elife_poa_e70818_Figure_2_figure_supplement_1.tif
- elife_poa_e70818_Figure_2_figure_supplement_2.tif
- elife_poa_e70818_Figure_3_figure_supplement_1.tif
- elife_poa_e70818_Figure_3_figure_supplement_2.tif
- elife_poa_e70818_Figure_7_figure_supplement_1.tif
- elife_poa_e70818_Source_data_1.xlsx
- elife_poa_e70818_Figure_3_figure_supplement_1_source_data_1.xlsx
- elife_poa_e70818_Figure_5_source_data_1.xlsx
- elife_poa_e70818_Figure_5_source_data_2.pdf
- elife_poa_e70818_Figure_5_source_data_3.xlsx
- elife_poa_e70818_Figure_3_source_code_1.zip
- elife_poa_e70818_Figure_4_source_code_1.zip
