# Supplementary material for: Astrocyte GluN2C NMDA receptors control basal synaptic strengths of hippocampal CA1 pyramidal neurons in the stratum radiatum
Source: eLife journal article supplement (doi:10.7554/elife.70818), 2021-10-25
Supplement: supp [file elife-70818-supp-v1.zip › elife_poa_e70818_Figure_5_source_data_3.xlsx]

## Sheet: Sheet1
	Animal 1 5w	Animal 1 5w	Animal 2 5w	Animal 2 5w	Animal 3 7w	Animal 3 7w	Animal 4 7w	Animal 4 7w	Animal 5 5w	Animal 5 5w
TOTAL no/area	section 1	section 2	section 1	section 2	section 1	section 2	section 1	section 2	section 1	section 2
Py NeuN+	328	346	168	160	283	275	354	369	434	438
SR NeuN+	73	72	21	21	56	68	68	73	68	99
GFAP+	376	319	125	130	319	308	355	372	396	449
tdTOMATO
Py NeuN+	24	31	9	9	9	19	21	15	26	20
SR NeuN+	6	3	0	1	2	3	4	0	0	5
GFAP+	330	259	120	128	221	215	276	292	304	362
%tdTOMATO+	%
Py NeuN+	7.31707	8.95954	5.35714	5.625	3.18021	6.90909	5.9322	4.06504	5.99078	4.56621
SR NeuN+	8.21918	4.16667	0	4.7619	3.57143	4.41176	5.88235	0	0	5.05051
GFAP+	87.766	81.1912	96	98.4615	69.279	69.8052	77.7465	78.4946	76.7677	80.6236
	% tdTomato positive cells	SEM
Py NeuN+	5.79023	0.52904
SR NeuN+	3.60638	0.88104
GFAP+	81.6135	3.10837
