# Supplementary material for: Astrocyte GluN2C NMDA receptors control basal synaptic strengths of hippocampal CA1 pyramidal neurons in the stratum radiatum
Source: eLife journal article supplement (doi:10.7554/elife.70818), 2021-10-25
Supplement: supp [file elife-70818-supp-v1.zip › elife_poa_e70818_Source_data_1.xlsx]

## Sheet: Sheet1
												Baseline				After drug				Normalized to baseline (% or Δ*)			Normality test (Baseline)
Figure	panel	experiment	Genotype	Drug condition	Drug Concentration	Time drug application	metrics	n# (cells)	n# (inputs, events, etc.)	n# (slices)	n# (animals)	time window	mean	stdev	SEM	time window	mean	stdev	SEM	mean	stdev	SEM	test	outcome	outcome	Multi-sample statistical test	outcome	Two sample comparison	statistical test	outcome
Figure 1	b	stratum radiatum stimulation + aCSF control	C57/BL6	aCSF control	N/A	10:30:00	paired pulse ratios	15	30	15	13	0:00-10:00	2.10205	0.551015	0.100601	15:00-25:00	2.16783	0.581322	0.106134	0.065781	0.366232	0.0668646	Shapiro-Wilk	W(30) = .946, p = .134	can't reject normality			baseline vs control	two-tailed paired sample t-test	t(29) = -0.984, p = .333
																													one-tailed f-test for equal variances	F(29,29) = 0.898, p =.612
	e						paired pulse ratios																					baseline vs ΔPPR	linear fit	Pearson's r = -.247, ANOVA F(1, 28) = 1.82, p = .188
																														X intercept = 2.50
	h						EPSC amplitudes (pA)					0:00-10:00	60.0415	30.3546	5.54196	15:00-25:00	58.7289	34.3504	6.27149	101.607	28.6822	5.23663			reject normality	Kruskal-Wallis ANOVA	Chi square = 4.86, p = 0.088, DF = 2
	c	stratum radiatum stimulation + MK801	C57/BL6	MK801	50μM	10:30:00	paired pulse ratios	14	28	14	9	0:00-10:00	2.18938	0.663724	0.125432	15:00-25:00	2.18694	0.484152	0.091496	0.0516574	0.267331	0.0505209	Shapiro-Wilk	W(28) = .982, p = .905	can't reject normality			baseline vs MK801	two-tailed paired sample t-test	t(27) = 0.183, p = .856
																													one-tailed f-test for equal variances	F(27,27) = 2.34, p = 0.016
	f						paired pulse ratios																					baseline vs. ΔPPR	linear fit	Pearson's r = -.757, ANOVA F(1, 26)= 34.87, p = 3.15E-6
																														X intercept = 1.9707
	i						EPSC amplitudes (pA)					0:00-10:00	74.0058	42.9184	8.11081	15:00-25:00	73.3742	34.1281	6.44961	109.049	39.9587	7.55149			reject normality			control (% baseline) vs +MK801 (% baseline)	Mann-Whitney U test	U = 391, p = .657, Z = -0.443
	d	stratum radiatum stimulation + AP5	C57/BL6	AP5	50μM	10:30:00	paired pulse ratios	12	24	12	11	0:00-10:00	2.15732	0.508839	0.103866	15:00-25:00	2.03119	0.356493	0.0727689	-0.126129	0.427392	0.087241	Shapiro-Wilk	W(24) = .954, p = .323	can't reject normality			baseline vs. AP5	two-tailed paired sample t-test	t(23) = 1.45, p = .162
																													one-tailed f-test for equal variances	F(23,23) = 2.04, p = .047
	g						paired pulse ratios																					baseline vs. ΔPPR	linear fit	Pearson's r = -.723, ANOVA F(1, 22) = 24.10, p = 6.56 E-5
																														X intercept = 1.9497
	j						EPSC amplitudes (pA)					0:00-10:00	76.3036	42.0878	8.59114	15:00-25:00	87.8483	50.0252	10.2113	119.954	34.1127	6.96322			can't reject normality			control (% baseline) vs +AP5 (% baseline)	Mann-Whitney U test	U = 232, p = .026, Z = -2.22
Figure 2	d	stratum radiatum stimulation	Grin1flx; DJ8 GFAP104-GFP		N/A		paired pulse ratios	43	72	43	14		1.79859	0.435148	0.0512827								Shapiro-Wilk	W(72) = .987, p = .683	can't reject normality			GFP vs. Cre	Two tailed t-test	t(136.11) = 0.352, p = .725
			Grin1flx; DJ8 GFAP104nls-mCherry-Cre		N/A		paired pulse ratios	46	74	46	12		1.7755	0.350176	0.0407072								Shapiro-Wilk	W(74) = .976, p = .175	can't reject normality				one-tailed f-test for equal variances	F(71,73) = 1.54, p = .033
	e	stratum radiatum stimulation Control +AP5	Grin1flx; AAV9 GFAP104nls-mCherry	AP5	50μM	10:30:00	paired pulse ratios	12	22	12	5	0:00-10:00	2.2801	0.641803	0.131007	15:00-25:00	2.01403	0.408183	0.08332	-0.266074	0.460161	0.0939299	Shapiro-Wilk	W(24) = .967, p = .594	can't reject normality			ΔCre baseline vs. ΔCre +AP5	two-tailed paired sample t-test	t(23) = 2.83, p = 0.009
																													one-tailed f-test for equal variances	F(23,23) = 2.47, p = .017
																												baseline vs. ΔPPR	linear fit	Pearson's r = -.774, ANOVA F(1,23) = 32.83, p = 9.19E-6
	g						EPSC amplitudes (pA)					0:00-10:00	78.3763	47.7644	9.74988	15:00-25:00	93.988	93.988	11.371	133.207	52.1102	10.637			reject normality			ΔCre +AP5 (% baseline) vs. Cre +AP5 (% baseline)	Mann-Whitney U test	U = 489, p < .001, Z = 2.80
	f	stratum radiatum stimulation Cre +AP5	Grin1flx; AAV9 GFAP104nls-mCherry-Cre	AP5	50μM	10:30:00	paired pulse ratios	14	24	14	5	0:00-10:00	2.39895	0.470951	0.0890014	15:00-25:00	2.56162	0.578399	0.109307	0.162667	0.496592	0.0938471	Shapiro-Wilk	W(28) =. 956, p = 285	can't reject normality			Cre baseline vs. Cre +AP5	two-tailed paired sample t-test	t(27) = -1.61, p = .118
																													one-tailed f-test for equal variances	F(27,27) = 0.731, p = .789
																												baseline vs. ΔPPR	linear fit	Pearson's r = -.378, ANOVA F(1, 26) =4.32, p = .04753
Figure 6	a	stratum radiatum stimulation + QNZ46	C57/BL6	QNZ46	25μM	10:30:00	paired pulse ratios	11	21	11	7	0:00-10:00	2.13995	0.575733	0.122747	17:30-27:30	2.04238	0.333214	0.0710414	-0.0975717	0.442307	0.0943002	Shapiro-Wilk	W(22) = .957, p = .427	can't reject normality			baseline vs. QNZ46	two-tailed paired sample t-test	t(21) = 1.03, p = .312
																													one-tailed f-test for equal variances	F(21,21) = 2.99, p = .00778
	b						paired pulse ratios																					baseline vs. ΔPPR	linear fit	Pearson's r = -.817, ANOVA F(1, 21) = 40.14, p = 3.49E-6
																														X intercept = 2.07
	c						EPSC amplitudes (pA)					0:00-10:00	40.9294	25.3531	5.40529	17:30-27:30	84.1713	72.3523	15.4256	177.242	94.6585	20.6562			reject normality			vehicle (% baseline) vs. QNZ46 (% baseline)	Mann-Whitney U test	U = 144, p = .014, Z = -2.45
	d	stratum radiatum stimulation Control + QNZ46	Grin1flx; AAV9 GFAP104nls-mCherry	QNZ46	25μM	10:30:00	paired pulse ratios	12	24	12	5	0:00-10:00	2.09139	0.433179	0.0884223	17:30-27:30	2.07813	0.314214	0.0641387	-0.0132598	0.366755	0.0748636	Shapiro-Wilk	W(24) = .961, p = .466	can't reject normality			ΔCre baseline vs. QNZ46	two-tailed paired sample t-test	t(23) = 1.77, p = .861
																													one-tailed f-test for equal variances	F(23,23) = 1.90, p = .065
																													linear fit	Pearson's r = -.703, ANOVA F(1, 23) = 21.52, p = 1.26E-4
	f						EPSC amplitudes (pA)					0:00-10:00	71.4961	32.0485	6.54187	17:30-27:30	91.3163	54.4755	11.1198	148.137	79.394	16.2062			can't reject normality			ΔCre +QNZ (% baseline) vs. Cre +QNZ (% baseline)	Mann-Whitney U test	U = 424, p = .005, Z = 2.79
	e	stratum radiatum stimulation Cre+ QNZ46	Grin1flx; AAV9 GFAP104nls-mCherry-Cre	QNZ46	25μM	10:30:00	paired pulse ratios	12	20	12	6	0:00-10:00	2.01208	0.433774	0.0885437	17:30-27:30	2.21172	0.470324	0.0960045	0.199641	0.404668	0.0826025	Shapiro-Wilk	W(24) = .961, p = .466	can't reject normality			Cre baseline vs. QNZ46	two-tailed paired sample t-test	t(23) = -2.41, p = .024
																													one-tailed f-test for equal variances	F(23,23) = 0.851, p = .649
																													linear fit	Pearson's r = -.372, ANOVA F(1, 23) = 3.54, p = 0.73
	g						EPSC amplitudes (pA)					0:00-10:00	77.9879	34.8357	7.1108	17:30-27:30	68.0819	47.5097	9.69787	88.5396	53.4225	10.9048			can't reject normality			vehicle (% baseline) vs. Cre +QNZ (% baseline)	Mann-Whitney U test	U = 364, p = .120, Z = 1.56
Figure 7	b	stratum oriens stimulation	Grin1flx; AAV9 GFAP104nls-mCherry		N/A		paired pulse ratios	25	50	25	7		1.59881	0.412643	0.0583565								Shapiro-Wilk	W(50) = .966, p = .152	can't reject normality			ΔCre vs. Cre	Mann-Whitney U test	U =1128, p = .402, Z = -0.838
			Grin1flx; AAV9 GFAP104nls-mCherry-Cre		N/A		paired pulse ratios	25	50	25	7		1.66521	0.343678	0.0486033								Shapiro-Wilk	W(50) = .947, p = .025	reject normality				one-tailed f-test for equal variances	F(1, 98) = 1.07, p = .303
	NA	stratum oriens + aCSF control	C57/BL6	aCSF control	N/A	10:30:00	paired pulse ratios	11	22	11	9	0:00-10:00	1.81059	0.384206	0.081913	15:00-25:00	1.88942	0.39732	0.084709	0.0627462	0.0627462	0.0425185	Shapiro-Wilk	W(22) = .967, p = .634	can't reject normality			baseline vs. control	two-tailed paired sample t-test	t(21) = -0.898, p = .379
																													one-tailed f-test for equal variances	F(21,21)= 0.935, p = .560
							EPSC amplitudes (pA)					0:00-10:00	48.9059	20.5589	4.38318	15:00-25:00	48.3972	23.0987	4.92466	100.621	38.508	8.20994			can't reject normality
	e	stratum oriens stimulation + MK801	C57/BL6	MK801	50μM	10:30:00	paired pulse ratios	12	24	12	6	0:00-10:00	1.75039	0.44189	0.0902005	17:30-27:30	1.73028	0.281811	0.0575244	0.0187082	0.185666	0.037899	Shapiro-Wilk	W(24) = .882, p = .009	reject normality			baseline vs. MK801	Wilcoxon signed rank test	Z = 0.043, p = .966
																													one-tailed f-test for equal variances	F(1,46) = 2.70, p = .107
	f						EPSC amplitudes (pA)					0:00-10:00	73.1457	35.2956	7.20469	17:30-27:30	78.5162	46.0191	9.39361	111.381	51.974	10.6091			reject normality			control SO (% baseline) vs. MK801 SO (% baseline)	Mann-Whitney U test	U = 251, p = .783, Z = -2.75
	g	stratum oriens +AP5	C57/BL6	AP5	50μM	10:30:00	paired pulse ratios	10	20	10	7	0:00-10:00	1.88866	0.4333	0.0968889	15:00-25:00	1.91773	0.426372	0.0953397	0.0324549	0.17064	0.0381562	Shapiro-Wilk	W(20) = .950, p = .369	can't reject normality			baseline vs. AP5	two-tailed paired sample t-test	t(19) = -0.308, p = .761
																													one-tailed f-test for equal variances	F(19,19) = 1.03, p = .472
	h						EPSC amplitudes (pA)					0:00-10:00	54.3748	26.5101	5.92783	15:00-25:00	43.8243	43.8243	5.82144	78.6442	23.4025	5.23295			can't reject normality			control SO (% baseline) vs. AP5 SO (% baseline)	Mann-Whitney U test	U = 308, p = .028, Z = 2.20
	d	stratum lacunosum moleculare	Grin1flx; DJ8 GFAP104-GFP		N/A		paired pulse ratios	47	67	47	12		1.8483	0.415242	0.0507299								Shapiro-Wilk	W(67) = .939, p = .003	reject normality			GFP vs. Cre	Mann-Whitney U test	U =2708, p = .161, Z = 1.40
			Grin1flx; DJ8 GFAP104nls-mCherry-Cre		N/A		paired pulse ratios	49	71	49	12		1.73876	0.390396	0.0463314								Shapiro-Wilk	W(71) = .965, p = .048	reject normality				one-tailed f-test for equal variances	F(1, 136) = 0.241, p = .624
	NA	stratum lacunosum moleculare +aCSF control	C57/BL6	aCSF control	N/A	10:30:00	paired pulse ratios	12	24	12	8	0:00-10:00	1.94497	0.381434	0.0778599	15:00-25:00	1.94809	0.369419	0.0754074	0.0168827	0.175044	0.0357308	Shapiro-Wilk	W(24) = .970, p = .670	can't reject normality			baseline vs. control	two-tailed paired sample t-test	t(23) = -0.041, p = .968
																													one-tailed f-test for equal variances	F(23,23) = 1.06, p = .440
	NA						EPSC amplitudes (pA)					0:00-10:00	17.324	6.18158	1.26181	15:00-25:00	16.1703	5.39451	1.10115	95.6626	18.1057	3.6958			reject normality
	i	stratum lacunosum moleculare stimulation + MK801	C57/BL6	MK801	50μM		paired pulse ratios	13	26	13	8	0:00-10:00	2.12233	0.39014	0.0765128	17:30-27:30	2.04586	0.519013	0.101787	-0.0370764	0.139027	0.0272655	Shapiro-Wilk	W(26) = .968, p = .580	can't reject normality			baseline vs. MK801	two-tailed paired sample t-test	t(25) = 1.22, p = .234
																													one-tailed f-test for equal variances	F(23,23) = 0.565, p = .920
	j						EPSC amplitudes (pA)					0:00-10:00	16.2629	6.71687	1.31729	17:30-27:30	15.6968	7.80932	1.53153	95.6157	15.8866	3.11561			reject normality			control SLM (% baseline) vs. MK801 SLM (% baseline)	Mann-Whitney U test	U = 306, p = .915, Z = -0.107
	k	stratum lacunosum moleculare +AP5	C57/BL6	AP5	50μM	10:30:00	paired pulse ratios	12	24	12	6	0:00-10:00	2.31399	0.451077	0.0920757	15:00-25:00	2.43925	0.517171	0.105567	0.0692551	0.220815	0.0450737	Shapiro-Wilk	W(24) = .948, p = .240	can't reject normality			baseline vs. AP5	two-tailed paired sample t-test	t(23) = -1.44, p = .163
																													one-tailed f-test for equal variances	F(23,23) = 0.761, p = .741
	l						EPSC amplitudes (pA)					0:00-10:00	15.1908	8.39662	1.71395	15:00-25:00	13.4273	7.44099	1.51889	90.6686	17.756	3.62443			reject normality			control SLM (% baseline) vs. AP5 SLM (% baseline)	Mann-Whitney U test	U = 337, p = .317, Z = 1.00
Figure 1-fig supplement 1	c	iMK801	C57/BL6	control	N/A	N/A	AMPAR EPSC	7		7	2		-131.367	42.2285	15.9609								Shapiro-Wilk		can't reject normality			control vs iMK801	Mann-Whitney U test	U = 20, p = .244, Z = -1.16
			C57/BL6	iMK801	1mM		AMPAR EPSC	9		9	3		-124.638	83.7396	27.9132								Shapiro-Wilk		reject normality
	d		C57/BL6	control (+AP5)	20 uM AP5		NMDAR EPSC	7		7	2		150.447	69.4485	26.2491	post AP5	27.7129	13.1613	4.9745				Shapiro-Wilk		can't reject normality			control vs iMK801	two-tailed t-test	t(14) = 5.28, 1.15E-4
			C57/BL6	iMK801 (+AP5)	20uM AP5		NMDAR EPSC	9		9	3		28.0935	8.62221	2.87407	post AP5	18.3241	9.41219	5.43413				Shapiro-Wilk		can't reject normality			control AP5 vs iMK801 AP5	two-tailed t-test	t(8) = 1.10, p = .302
	e		C57/BL6	control	N/A	N/A	AMPAR PPR	7		7	2		1.52421	0.303309	0.11464								Shapiro-Wilk		can't reject normality			control vs iMK801	two-tailed t-test	t(14) = -0.361, p = .734
			C57/BL6	iMK801	1mM		AMPAR PPR	9		9	3		1.5923	0.420051	0.140017								Shapiro-Wilk		can't reject normality
Figure 1-fig supplement 2	a	stratum radiatum stimulation + vehicle (1:1000 DMSO) control	C57/BL6	DMSO	0.1% by volume	10:30:00	paired pulse ratios	12	24	12	11	0:00-10:00	2.06988	0.407262	0.0831321	17:30-27:30	2.03291	0.388824	0.0793685	-0.0369716	0.381261	0.0778246	Shapiro-Wilk	W(24) = .964, p = .529	can't reject normality			baseline vs. vehicle	two-tailed paired sample t-test	t(23) = 0.745, p = .464
																													one-tailed f-test for equal variances	F(23,23) = 1.09, p = .836
	d						EPSC amplitudes (pA)					0:00-10:00	60.4791	32.1499	6.56258	17:30-27:30	60.1906	39.818	8.12781	110.108	60.0278	12.2531	Shapiro-Wilk	W(24) = .907, p = .031	reject normality	Kruskal-Wallis ANOVA	Chi square = 5.77, p = 0.053, DF = 2
	g						CV-2					0:00-10:00	10.6465	8.47595	1.73015	17:30-27:30	14.2324	15.8019	3.22554	1.79314	1.90669	0.389202	Shapiro-Wilk	W(24) = .853, p = .0025	reject normality			baseline vs vehicle	Wilcoxon Signed Rank Test	Z = -0.786, p = .432
							Ratio of EPSC vs ratio of CV-2																					control ΔEPSC vs. control Δ1/CV2	linear fit	Pearson's r = .535, ANOVA F(1, 23) = 8.807, p = .007
	b	stratum radiatum stimulation + Ro25-6981	C57/BL6	Ro25-6981	10μM	10:30:00	paired pulse ratios	17	30	17	11	0:00-10:00	2.02469	0.342786	0.062584	17:30-27:30	2.10682	0.33309	0.0608137	0.0821268	0.343446	0.0627043	Shapiro-Wilk	W(30) = .955, p = .235	can't reject normality			baseline vs. Ro25-6981	two-tailed paired sample t-test	t(29) = -0.652, p = .519
																													one-tailed f-test for equal variances	F(29,29) = 1.14, p = .362
	e						EPSC amplitudes (pA)					0:00-10:00	55.6505	30.7369	5.61177	17:30-27:30	65.1514	46.5493	8.4987	116.44	38.0946	6.95509	Shapiro-Wilk	W(30) = .967, p = .469	can't reject normality			vehicle (% baseline) vs. Ro25-6981 (% baseline)	Mann-Whitney U test	U = 295, p = .261, Z = -1.12
	g						CV-2					0:00-10:00	7.28454	4.64395	0.847866	17:30-27:30	11.7687	8.91185	1.62707	1.76095	1.1696	0.213539	Shapiro-Wilk	W(30) = .885, p = .0038	reject normality			baseline vs Ro25-6981	Wilcoxon Signed Rank Test	Z = -3.06, p = .002
							Ratio of EPSC vs ratio of CV-2																					Ro25-6981 ΔEPSC vs. Ro25-6981 Δ1/CV2	linear fit	Pearson's r = .385, ANOVA F(1, 29) = 4.86, p = .036
	c	stratum radiatum stimulation + MPEP	C57/BL6	MPEP	25μM	10:30:00	paired pulse ratios	13	26	13	5	0:00-10:00	2.49542	0.647923	0.127068	17:30-27:30	2.69728	0.599074	0.117488	0.201863	0.4354	0.0853889	Shapiro-Wilk	W(26) = .850, p = .001	reject normality			baseline vs MPEP	Wilcoxon Signed Rank Test	Z = -2.133, p = .033
																													one-tailed f-test for equal variances	F (25, 25) = 1.17, p = .349
	f						EPSC amplitudes (pA)					0:00-10:00	39.7673	17.9136	3.51314	17:30-27:30	35.994	18.7984	3.68667	93.6572	40.89	8.0192	Shapiro-Wilk	W(26) = .897, p = .013	reject normality			vehicle (% baseline) vs. MPEP (% baseline)	Mann-Whitney U test	U = 386, p = .281, Z = 1.078
	i						CV-2					0:00-10:00	4.87888	3.04962	0.59808	17:30-27:30	5.37647	2.95098	0.578734	1.2548	0.630686	0.123688	Shapiro-Wilk	W(26) = .766, p = .4.93E-5	reject normality			baseline vs MPEP	Wilcoxon Signed Rank Test	Z = -1.02, p = .310
							Ratio of EPSC vs ratio of CV-2																					MPEP ΔEPSC vs. MPEP Δ1/CV2	linear fit	Pearson's r = .297, ANOVA F(1, 25) = 2.33, p = .140
Figure 1-fig supplement 3	b	stratum radiatum 1/CV2	C57/BL6	control	N/A	10:30:00	1/CV2					0:00-10:00	11.382	8.93529	1.63135	15:00-25:00	12.4351	14.2808	2.6073	1.17934	1.14496	0.20904	Shapiro-Wilk	W(30) = .827, p = 2.15E-4	reject normality			baseline vs control	Wilcoxon signed rank test	Z = 0.843, p = .422
				MK801	50μM	10:30:00	1/CV2					0:00-10:00	12.0688	12.6284	2.38654	15:00-25:00	11.0894	6.51569	1.23135	1.51796	1.29337	0.244424	Shapiro-Wilk	W(28) = .747, p = 1.41E-5	reject normality			baseline vs. MK801	Wilcoxon signed rank test	Z = 0.034, p = .991
				AP5	50μM	10:30:00	1/CV2					0:00-10:00	7.72507	4.79799	0.979386	15:00-25:00	13.2681	9.83467	2.00749	1.84021	0.868787	0.17734	Shapiro-Wilk	W(24) = .883, p = .010	reject normality			baseline vs. AP5	Wilcoxon signed rank test	Z = -2.93, p = .003
				QNZ	25μM	10:30:00	1/CV2					0:00-10:00	6.84227	5.74092	1.22397	17:30-27:30	12.2778	13.532	2.88503	1.91076	1.43369	0.305665	Shapiro-Wilk	W(22) = .754, p = 1.03E-4	reject normality			baseline vs QNZ46	Wilcoxon signed rank test	Z = -2.60, p = .009
	c	stratum radiatum stimulation 1/CV2 vs EPSCs	C57/BL6	control	N/A	10:30:00	1/CV2 & EPSCs					See above (Figure 2 and Figure S4B)																control ΔEPSC vs. control Δ1/CV2	linear fit	Pearson's r = .345, ANOVA F(1, 29) = 3.77, p = .062
	d		C57/BL6	MK801	50μM	10:30:00	1/CV2 & EPSCs																					MK801 ΔEPSC vs. MK801 Δ1/CV2	linear fit	Pearson's r = .420, ANOVA F(1, 27) = 5.55, p = 0.026
	e		C57/BL6	AP5	50μM	10:30:00	1/CV2 & EPSCs																					AP5 ΔEPSC vs. AP5 Δ1/CV2	linear fit	Pearson's r = .401, ANOVA F(1, 23) = 4.21, p = .052
	f		C57/BL6	QNZ	25μM	10:30:00	1/CV2 & EPSCs																					QNZ46 ΔEPSC vs. QNZ46 Δ1/CV2	linear fit	Pearson's r = .369, ANOVA F(1,20) = 2.99, p = .100
	g	stratum radiatum stimulation PPR vs EPSCs	C57/BL6	control	N/A	10:30:00	paired pulse ratios & EPSCs																					control ΔEPSC vs.control ΔPPR	linear fit	Pearson's r = -.366, ANOVA F(1, 29) = 4.32, p = .047
	h		C57/BL6	AP5	50μM	10:30:00	paired pulse ratios & EPSCs																					MK801 ΔEPSC vs. MK801 ΔPPR	linear fit	Pearson's r = -.474, ANOVA F(1, 27) = 5.55, p = .011
	i		C57/BL6	MK801	50μM	10:30:00	paired pulse ratios & EPSCs																					AP5 ΔEPSC vs. AP5 ΔPPR	linear fit	Pearson's r = -.324, ANOVA F(1, 23) = 2.59, p = .122
	j		C57/BL6	QNZ	25μM	10:30:00	paired pulse ratios & EPSCs																					QNZ46 ΔEPSC vs. QNZ ΔPPR	linear fit	Pearson's r = -.268, ANOVA F(1, 20) = 1.47, p = .240
Figure 1-fig supplement 4	a	sEPSC amplitude measurements	C57/BL6	control	N/A	N/A	sEPSC amplitude (pA)	12		12	10	0:00-10:00	15.1469	2.41667	0.697632	15:00-25:00	14.2526	2.10117	0.606556	94.4318	5.33332	1.5396	Shapiro-Wilk		can't reject normality	one way ANOVA (comparison of normalized change)	F(4, 58) = .679, p = .614	baseline vs control	two-tailed paired sample t-test	t(11) = 3.48, p = .0051
	b		C57/BL6	AP5	50μM	10:30:00	sEPSC amplitude (pA)	10		10	9	0:00-10:00	15.0806	2.31844	0.733155	15:00-25:00	13.6042	1.28831	0.407399	91.1367	8.1405	2.57425			can't reject normality			baseline vs.MK801	two-tailed paired sample t-test	t(13) = 3.00, p = .010
	c		C57/BL6	MK801	50μM	10:30:00	sEPSC amplitude (pA)	14		14	9	0:00-10:00	20.0117	1.96129	0.524177	15:00-25:00	18.7534	1.69592	0.453254	93.1636	7.89702	2.38104			can't reject normality			baseline vs.AP5	two-tailed paired sample t-test	t(9) = 3.56, p = .0062
	d		C57/BL6	QNZ46	25μM	10:30:00	sEPSC amplitude (pA)	11		11	8	0:00-10:00	13.0792	1.09106	0.328966	17:30-27:30	12.5502	0.992182	0.299154	96.4854	10.2185	3.08099			can't reject normality			baseline vs QNZ46	two-tailed paired sample t-test	t(10) = 1.25, p = .238
	e		C57/BL6	Ro25-6981	10μM	10:30:00	sEPSC amplitude (pA)	15		15	10	0:00-10:00	12.5113	1.41749	0.365994	15:00-25:00	11.9306	1.05674	0.27285	96.2342	11.5327	2.97774			can't reject normality			baseline vs Ro25-6981	two-tailed paired sample t-test	t(16) = 1.94, p = .070
	a	sEPSC frequency measurements	C57/BL6	control	N/A	N/A	sEPSC frequency (Hz)	12		12	10	0:00-10:00	0.486528	0.241458	0.0697028	15:00-25:00	0.391528	0.256578	0.0740676	84.8906	33.0437	9.53888	Shapiro-Wilk		can't reject normality	Kruskal-Wallis ANOVA (comparison of normalized changes)	Chi square =6.62, p = .158, DF = 4	baseline vs control	two-tailed paired sample t-test	t(11) = 1.62, p = .133
	b		C57/BL6	AP5	50μM	10:30:00	sEPSC frequency (Hz)	10		10	9	0:00-10:00	1.32433	0.982905	0.310822	15:00-25:00	0.8715	0.817679	0.258573	94.0167	127.499	40.3188			can't reject normality			baseline vs.MK801	two-tailed paired sample t-test	t(13) = -0.160, p = .875
	c		C57/BL6	MK801	50μM	10:30:00	sEPSC frequency (Hz)	14		14	9	0:00-10:00	0.400238	0.280514	0.0749705	15:00-25:00	0.40869	0.338232	0.0903963	92.3829	43.6735	13.168			reject normality			baseline vs.AP5	Wilcoxon Signed Rank Test	Z = 1.83, p = .067
	d		C57/BL6	QNZ46	25μM	10:30:00	sEPSC frequency (Hz)	11		11	8	0:00-10:00	0.75798	0.377307	0.113762	17:30-27:30	0.644545	0.40835	0.123122	81.9818	27.2789	8.2249			can't reject normality			baseline vs QNZ46	two-tailed paired sample t-test	t(10) = 2.08, p = .065
	e		C57/BL6	Ro25-6981	10μM	10:30:00	sEPSC frequency (Hz)	15		15	10	0:00-10:00	0.677889	0.484549	0.12511	15:00-25:00	0.739778	0.738003	0.190552	112.771	54.2843	14.0161			reject normality			baseline vs Ro25-6981	Wilcoxon Signed Rank Test	Z = .586, p = .57
	f	EPSC rise-time	C57/BL6	control	N/A		EPSC rise-time	12	24	12	10	0:00-10:00	2.26539	0.822811	0.167956	15:00-25:00	2.47729	0.84453	0.172389				Shapiro-Wilk		reject normality			baseline vs control	Mann-Whitney U test	U = 262, p = .599, Z = -.526
	g		C57/BL6	AP5	50μM		EPSC rise-time	8	16	8	11	0:00-10:00	1.80142	0.27576	0.0689399	15:00-25:00	2.1455	0.685213	0.161506						can't reject normality			baseline vs.MK801	Mann-Whitney U test	U = 290, p = .676, Z = -.418
	h		C57/BL6	MK801	50μM		EPSC rise-time	13	26	13	9	0:00-10:00	2.36169	0.852071	0.167105	15:00-25:00	2.61396	1.2508	0.255318						reject normality			baseline vs.AP5	two-tailed t-test	t(32) = -1.88, p = .070
	i		C57/BL6	QNZ46	25μM		EPSC rise-time	9	18	9	6	0:00-10:00	2.0613	0.784344	0.184872	17:30-27:30	1.88526	0.620326	0.165789						reject normality			baseline vs QNZ46	Mann-Whitney U test	U = 136, p = .718, Z = .361
	j		C57/BL6	Ro25-6981	10μM		EPSC rise-time	16	32	16	11	0:00-10:00	1.89996	0.619417	0.109498	15:00-25:00	2.02436	1.09842	0.194175						reject normality			baseline vs Ro25-6981	Mann-Whitney U test	U = 509, p = .973, Z = -.033
	f	EPSC decay	C57/BL6	control	N/A		EPSC decay	12	24	12	10	0:00-10:00	8.95184	2.85039	0.529304	15:00-25:00	10.6438	5.53903	1.02857				Shapiro-Wilk		reject normality			baseline vs control	Mann-Whitney U test	U = 342, p = .225, Z = -1.21
	g		C57/BL6	AP5	50μM		EPSC decay	8	16	8	11	0:00-10:00	8.31424	1.74875	0.372836	15:00-25:00	9.7512	2.89472	0.617157						can't reject normality			baseline vs.MK801	two-tailed t-test	t(54) = -1.21, p = .232
	h		C57/BL6	MK801	50μM		EPSC decay	13	26	13	9	0:00-10:00	7.90937	1.93218	0.365147	15:00-25:00	8.57033	2.15149	0.406593						reject normality			baseline vs.AP5	Mann-Whitney U test	U = 162, p = .062, Z = -1.87
	i		C57/BL6	QNZ46	25μM		EPSC decay	9	18	9	6	0:00-10:00	9.55243	2.51137	0.561559	17:30-27:30	9.80956	3.72922	0.932305						reject normality			baseline vs QNZ46	Mann-Whitney U test	U = 168, p = .811, Z = .239
	j		C57/BL6	Ro25-6981	10μM		EPSC decay	16	32	16	11	0:00-10:00	9.36959	3.08726	0.529461	15:00-25:00	9.94694	2.50369	0.435837						can't reject normality			baseline vs Ro25-6981	two-tailed t-test	t(63) = -1.07, p = .285
Figure 1-fig supplement 5	c	stratum radiatum two-pathway stimulation	C57/BL6	control	N/A	10:30:00	PPR disparity	15	30	15	13	0:00-10:00	0.662156	0.392708	0.101397	15:00-25:00	0.636933	0.37563	0.0969872	101.43	49.9261	12.8909	Assume PPR disparity data is non-parametric					baseline vs control	Wilcoxon signed rank test	Z = 0.312, p = .755
	d		C57/BL6	MK801	50μM	10:30:00	PPR disparity	14	28	14	9	0:00-10:00	0.66874	0.344539	0.0920819	15:00-25:00	0.373129	0.209603	0.0560189	63.4073	27.0493	7.22922						baseline vs.MK801	Wilcoxon signed rank test	Z = 3.20, p = .0014
	e		C57/BL6	AP5	50μM	10:30:00	PPR disparity	12	24	12	11	0:00-10:00	0.645882	0.181739	0.0524634	15:00-25:00	0.384425	0.206845	0.0597111	58.6221	23.6536	6.8282						baseline vs.AP5	Wilcoxon signed rank test	3
	f		C57/BL6	QNZ46	25μM	10:30:00	PPR disparity	11	22	11	7	0:00-10:00	0.976145	0.253501	0.0764334	17:30-27:30	0.479585	0.136317	0.041101	54.3217	28.0188	8.44799						baseline vs QNZ46	Wilcoxon signed rank test	Z = 2.80, p = .0051
	g		C57/BL6	Ro-6981	10μM	10:30:00	PPR disparity	15	30	15	11	0:00-10:00	0.786591	0.284056	0.0787829	17:30-27:30	0.764755	0.22054	0.0611668	103.697	41.3247	10.67						baseline vs Ro25-6981	Wilcoxon signed rank test	Z = -.426, p = .670
	h		C57/BL6	MPEP	25μM	10:30:00	PPR disparity	13	26	13	5	0:00-10:00	0.973342	0.645585	0.179053	17:30-27:30	1.11909	0.745806	0.206849	137.142	89.0946	24.7104						baseline vs MPEP	Wilcoxon signed rank test	Z = -1.12, p = .263
Figure 2-fig supplement 1	a	NMDA/glycine puff stratum radiatum	Grin1flx; AAV9 GFAP104nls-mCherry	control	N/A		depolarization amplitude (mV)	14		14	3		10.7136	4.51124	1.20568								Shapiro-Wilk		can't reject normality	one way ANOVA (comparison of ΔCre SR, SO, SLM)	F(2, 30) = 8.76, p = 0.001	ΔCre vs. Cre	Two-tailed t-test	t(26) = 2.96, p = .006
			Grin1flx AAV9 GFAP104nls-mCherry	control +AP5	50μM		depolarization amplitude (mV)	9		9	3		0.573685	0.301675	0.100558										can't reject normality
			Grin1flx; AAV9 GFAP104nls-mCherry-Cre	Cre	N/A		depolarization amplitude (mV)	14		14	3		5.92917	4.02367	1.07537										can't reject normality
			Grin1flx; AAV9 GFAP104nls-mCherry-Cre	Cre +AP5	50μM		depolarization amplitude (mV)	8		8	3		0.35389	0.469513	0.165998										reject normality
	b	NMDA/glycine puff stratum oriens	Grin1flx; AAV9 GFAP104nls-mCherry	control	N/A		depolarization amplitude (mV)	8		8	4		11.3283	5.74455	2.03101								Shapiro-Wilk		can't reject normality			ΔCre vs. Cre	Two-tailed t-test	t(14)= 1.21, p = .247
			Grin1flx; AAV9 GFAP104nls-mCherry	control +AP5	50μM		depolarization amplitude (mV)	7		7	4		1.41879	1.82258	0.688869										reject normality
			Grin1flx; AAV9 GFAP104nls-mCherry-Cre	Cre	N/A		depolarization amplitude (mV)	8		8	4		8.49306	3.32461	1.17543										can't reject normality
			Grin1flx; AAV9 GFAP104nls-mCherry-Cre	Cre +AP5	50μM		depolarization amplitude (mV)	8		8	4		0.842904	0.799875	0.282799										can't reject normality
	c	NMDA/glycine puff stratum lacunosum moleculare	Grin1flx; AAV9 GFAP104nls-mCherry	control	N/A		depolarization amplitude (mV)	9		9	2		3.85826	1.54198	0.513993								Shapiro-Wilk		can't reject normality			ΔCre vs. Cre	Two-tailed t-test	t(15) = 1.15, p = .268
			Grin1flx; AAV9 GFAP104nls-mCherry	control +AP5	50μM		depolarization amplitude (mV)	6		6	2		0.265923	0.109108	0.0445433										can't reject normality
			Grin1flx; AAV9 GFAP104nls-mCherry-Cre	Cre	N/A		depolarization amplitude (mV)	8		8	2		2.86531	2.0113	0.7111										can't reject normality
			Grin1flx; AAV9 GFAP104nls-mCherry-Cre	Cre +AP5	50μM		depolarization amplitude (mV)	5		5	2		0.162962	0.175677	0.0785652										can't reject normality
	d	Astrocyte Rin stratum radiatim	Grin1flx; AAV9 GFAP104nls-mCherry				input resistance	17		17	8		13.8438	5.49393	1.33247								Shapiro-Wilk		can't reject normality	Kuskal-Wallis ANOVA	Chi square =6.83, p = .234, DF = 5	SR ΔCre vs Cre	Mann-Whitney U test	U = 164, p = .867, Z = -0.168
			Grin1flx; AAV9 GFAP104nls-mCherry-Cre				input resistance	20		20	10		13.6166	5.02606	1.12386								Shapiro-Wilk		reject normality
		Astrocyte Rin stratum oriens	Grin1flx; AAV9 GFAP104nls-mCherry				input resistance	16		16	10		13.3449	5.10438	1.2761								Shapiro-Wilk		can't reject normality			SO ΔCre vs Cre	two-tailed t-test	t(29) = 0.107, p = .915
			Grin1flx; AAV9 GFAP104nls-mCherry-Cre				input resistance	ki		16	11		14.3234	6.10525	1.52631								Shapiro-Wilk		can't reject normality
		Astrocyte Rin stratum lacunosum moleculare	Grin1flx; AAV9 GFAP104nls-mCherry				input resistance	19		19	8		11.076	3.13381	0.718945								Shapiro-Wilk		reject normality			SLM ΔCre vs Cre	Mann-Whitney U test	U = 186, p = .660, Z = 0.441
			Grin1flx; AAV9 GFAP104nls-mCherry-Cre				input resistance	18		18	9		11.0739	3.7432	0.88228								Shapiro-Wilk		reject normality
Figure 2-fig supplement 2	a	stratum radiatum stimulation PPR disparity	Grin1flx; DJ8 GFAP104-GFP		N/A		PPR disparity	29	58	29	8		0.395248	0.34823	0.0646646								Assume PPR disparity data is non-parametric					GFP vs. Cre	Mann-Whitney U test	U = 570, p = .0091, Z = 2.61
			Grin1flx; DJ8 GFAP104nls-mCherry-Cre		N/A		PPR disparity	28	56	28	6		0.204918	0.195441	0.0369348
	b	EPSC rise-time	Grin1flx; DJ8 GFAP104-GFP		N/A		rise-time	23	46	23	8		1.9707	0.637015	0.099485								Shapiro-Wilk		reject normality			GFP or ΔCre vs. Cre	Mann-Whitney U test	U = 1127, p = .078, Z = 1.76
			Grin1flx; DJ8 GFAP104nls-mCherry-Cre		N/A		rise-time	21	41	21	6		1.71289	0.492762	0.0734567
		EPSC decay	Grin1flx; DJ8 GFAP104-GFP		N/A		decay	23	46	23	8		8.3069	2.00826	0.296102								Shapiro-Wilk		reject normality			GFP or ΔCre vs. Cre	Mann-Whitney U test	U = 1317, p = .391, Z = .858
			Grin1flx; DJ8 GFAP104nls-mCherry-Cre		N/A		decay	26	52	26	6		8.62438	3.43076	0.475761
	c	sEPSC amplitude	Grin1flx; AAV9 GFAP104nls-mCherry		N/A		sEPSC amplitude (pA)	23		23	5		14.7288	3.21162	0.669669								Shapiro-Wilk		reject normality			ΔCre vs. Cre	Mann-Whitney U test	U = 273, p = .609, Z = -0.511
			Grin1flx; AAV9 GFAP104nls-mCherry-Cre		N/A		sEPSC amplitude (pA)	26		26	5		15.7055	4.41712	0.866268										reject normality
		sEPSC frequency	Grin1flx; AAV9 GFAP104nls-mCherry		N/A		sEPSC frequency (Hz)	23		23	5		0.905362	0.932701	0.194482								Shapiro-Wilk		reject normality			ΔCre vs. Cre	Mann-Whitney U test	U = 377, p = .121, Z = 1.55
			Grin1flx; AAV9 GFAP104nls-mCherry-Cre		N/A		sEPSC frequency (Hz)	26		26	5		0.540897	0.418208	0.0820173										reject normality
	d	sEPSC amplitude +AP5	Grin1flx; AAV9 GFAP104nls-mCherry	control +AP5	50μM	10:30:00	sEPSC amplitude (pA)	11		11	5	0:00-10:00	16.5098	3.50596	1.05709	15:00-25:00	17.1307	3.67253	1.10731	105.263	21.0569	6.34888	Shapiro-Wilk		can't reject normality	Kruskal-Wallis ANOVA (comparison of normalized changes)	Chi square =5.30, p = .151, DF = 3	ΔCre baseline vs ΔCre AP5	two-tailed paired sample t-test	t(10) = -.702, p = .498
	e		Grin1flx; AAV9 GFAP104nls-mCherry-Cre	Cre + AP5	50μM	10:30:00	sEPSC amplitude (pA)	14		14	5	0:00-10:00	18.8502	3.57773	0.956189	15:00-25:00	18.757	3.26433	0.872428	101.298	16.4531	4.39727			reject normality			Cre baseline vs Cre AP5	Wilcoxon signed rank test	Z = -1.00, p = .315
																												ΔCre AP5 vs Cre AP5 (normalized values)	Mann-Whitney U test	U = 71, p = .763, Z = -0.301
	f	sEPSC amplitude +QNZ46	Grin1flx; AAV9 GFAP104nls-mCherry	control +QNZ46	25μM	10:30:00	sEPSC amplitude (pA)	12		12	5	0:00-10:00	13.0962	1.83713	0.530335	17:30-27:30	12.1369	1.65995	0.479185	93.2818	10.9968	3.17451			can't reject normality			ΔCre baseline vs ΔCre QNZ	two-tailed paired sample t-test	t(11) = 2.20, p = .050
	g		Grin1flx; AAV9 GFAP104nls-mCherry-Cre	Cre +QNZ46	25μM	10:30:00	sEPSC amplitude (pA)	12		12	6	0:00-10:00	12.0366	1.39475	0.402629	17:30-27:30	11.368	1.15638	0.333819	95.1368	10.4829	3.02616			can't reject normality			Cre baseline vs Cre QNZ	two-tailed paired sample t-test	t(11) = 1.73, p = .112
																												ΔCre QNZ vs Cre QNZ (normalized values)	two-tailed t-test	t(22) = -0.422, p = 676
	d	sEPSC frequency + AP5	Grin1flx; AAV9 GFAP104nls-mCherry	control +AP5	50μM	10:30:00	sEPSC frequency (Hz)	11		11	5	0:00-10:00	0.472424	0.226519	0.068298	15:00-25:00	0.342424	0.182823	0.0551231	79.3098	35.9226	10.8311	Shapiro-Wilk		can't reject normality	Kruskal-Wallis ANOVA (comparison of normalized changes)	Chi square =3.71, p = .295, DF = 3	ΔCre baseline vs ΔCre AP5	two-tailed paired sample t-test	t(10) = 2.24, p = .049
	e		Grin1flx; AAV9 GFAP104nls-mCherry-Cre	Cre + AP5	50μM	10:30:00	sEPSC frequency (Hz)	14		14	5	0:00-10:00	0.30869	0.19309	0.0516055	15:00-25:00	0.305357	0.165592	0.0442562	107.344	69.7544	18.6426			can't reject normality			Cre baseline vs Cre AP5	two-tailed paired sample t-test	t(13) = 0.067, p = .947
																												ΔCre AP5 vs Cre AP5 (normalized values)	two-tailed t-test	t(23) = -1.30, p = .239
	f	sEPSC frequency + QNZ46	Grin1flx; AAV9 GFAP104nls-mCherry	control +QNZ46	25μM	10:30:00	sEPSC frequency (Hz)	12		12	5	0:00-10:00	1.30222	1.15497	0.333412	17:30-27:30	0.740694	0.523057	0.150993	69.8889	23.4651	6.7738			reject normality			ΔCre baseline vs ΔCre QNZ	Wilcoxon signed rank test	Z = 2.78, p = .0054
	g		Grin1flx; AAV9 GFAP104nls-mCherry-Cre	Cre +QNZ46	25μM	10:30:00	sEPSC frequency (Hz)	12		12	6	0:00-10:00	0.811806	0.452486	0.130621	17:30-27:30	0.759028	0.424204	0.122457	107.895	74.8862	21.6178			can't reject normality			Cre baseline vs Cre QNZ	two-tailed paired sample t-test	t(11) = .459, p = .655
																												ΔCre QNZ vs Cre QNZ (normalized values)	Mann-Whitney U test	U = 47, p = .157, Z = -1.41
	h	stratum radiatum two-pathway stimulation + AP5	Grin1flx; AAV9 GFAP104nls-mCherry	control +AP5	50μM	10:30:00	PPR disparity	12	24	12	6	0:00-10:00	0.696278	0.307157	0.0886687	15:00-25:00	0.41296	0.199922	0.0577126	63.2321	31.5058	9.09495	Assume PPR disparity data is non-parametric					ΔCre baseline vs ΔCre AP5	Wilcoxon signed rank test	Z = 2.47, p = .013
	i		Grin1flx; AAV9 GFAP104nls-mCherry-Cre	Cre + AP5	50μM	10:30:00	PPR disparity	14	28	14	5	0:00-10:00	0.695044	0.269619	0.0720587	15:00-25:00	0.626337	0.29478	0.0787831	97.8955	58.2462	15.567						Cre baseline vs Cre AP5	Wilcoxon signed rank test	Z = 1.00, p = .315
	j	stratum radiatum two-pathway stimulation + QNZ46	Grin1flx; AAV9 GFAP104nls-mCherry	control +QNZ46	25μM	10:30:00	PPR disparity	12	24	12	5	0:00-10:00	0.640906	0.421432	0.121657	17:30-27:30	0.384861	0.203348	0.0587015	74.4162	39.8955	11.5168						ΔCre baseline vs ΔCre QNZ	Wilcoxon signed rank test	Z = 2.16, p = .031
	k		Grin1flx; AAV9 GFAP104nls-mCherry-Cre	Cre +QNZ46	25μM	10:30:00	PPR disparity	12	24	12	6	0:00-10:00	0.59341	0.330612	0.0954395	17:30-27:30	0.809424	0.343395	0.0991295	152.178	78.1208	22.5515						Cre baseline vs Cre QNZ	Wilcoxon signed rank test	Z = -1.53, p = .126
	l	stratum radiatum stimulation 1/CV2 vs EPSCs + AP5	Grin1flx; AAV9 GFAP104nls-mCherry	control +AP5	50μM	10:30:00	1/CV2 & EPSCs	12	24	12	6	0:00-10:00				15:00-25:00												ΔCre baseline vs ΔCre AP5	linear fit	Pearson's r = .120, ANOVA F(1, 23) = 0.322, p = .576
							1/CV2					0:00-10:00	11.6499	9.93157	2.02727	15:00-25:00	22.5877	1.86475	0.38064	1.95699	1.86475	0.38064	Shapiro-Wilk		reject normality			ΔCre baseline vs ΔCre AP5	Wilcoxon signed rank test	Z = -1.9, p = .057
	m		Grin1flx; AAV9 GFAP104nls-mCherry-Cre	Cre + AP5	50μM	10:30:00	1/CV2 & EPSCs	14	28	14	5	0:00-10:00				15:00-25:00												Cre baseline vs Cre AP5	linear fit	Pearson's r = .427, ANOVA F(1, 27) = 5.79, p = .024
							1/CV2					0:00-10:00	6.51633	4.50684	0.851713	15:00-25:00	8.25827	7.48789	1.41508	1.45235	1.1375	0.214967	Shapiro-Wilk		reject normality			Cre baseline vs Cre AP5	Wilcoxon signed rank test	Z = -1.29, p = .198
	n	stratum radiatum stimulation 1/CV2 vs EPSCs + QNZ46	Grin1flx; AAV9 GFAP104nls-mCherry	control +QNZ46	25μM	10:30:00	1/CV2 & EPSCs	12	24	12	5	0:00-10:00				15:00-25:00												ΔCre baseline vs ΔCre QNZ	linear fit	Pearson's r = .766, ANOVA F(1, 23) = 31.18, p = 1.30E-5
							1/CV2					0:00-10:00	10.3381	6.28623	1.28317	15:00-25:00	11.2792	7.45781	1.52232	1.56895	1.20886	0.246757	Shapiro-Wilk		reject normality			ΔCre baseline vs ΔCre QNZ	Wilcoxon signed rank test	Z = -0.7, p = .484
	o		Grin1flx; AAV9 GFAP104nls-mCherry-Cre	Cre +QNZ46	25μM	10:30:00	1/CV2 & EPSCs	12	24	12	6	0:00-10:00				15:00-25:00												Cre baseline vs Cre QNZ	linear fit	Pearson's r = .345, ANOVA F (1, 23) = 2.97, p = .099
							1/CV2					0:00-10:00	12.2004	23.3429	4.76486	15:00-25:00	10.1261	11.1572	2.27745	1.41556	1.47908	0.301916	Shapiro-Wilk		reject normality			Cre baseline vs Cre QNZ	Wilcoxon signed rank test	Z = -0.671, p = .502
Figure 7-fig supplement 1	a	stratum oriens two-pathway stimulation	C57/BL6	control	N/A	10:30:00	PPR disparity	11	22	11	9	0:00-10:00	0.569434	0.569434	0.109593	15:00-25:00	0.497318	0.497318	0.062855	101.186	47.2002	14.2314	Assume PPR disparity data is non-parametric					baseline vs control	Wilcoxon signed rank test	Z = .222, p = .824
	b		C57/BL6	MK801	50μM	10:30:00	PPR disparity	12	24	12	6	0:00-10:00	0.550467	0.348591	0.10063	15:00-25:00	0.464261	0.255778	0.0738368	98.8282	54.1762	15.6393						baseline vs MK801	Wilcoxon signed rank test	Z = .275, p = .784
	c		C57/BL6	AP5	50μM	10:30:00	PPR disparity	10	20	10	7	0:00-10:00	0.432203	0.308966	0.0977036	15:00-25:00	0.614203	0.322082	0.101851	161.944	65.6812	20.7702						baseline vs AP5	Wilcoxon signed rank test	Z = -1.94, p = .048
	d	stratum lacunosum moleculare two-pathway stimulation	C57/BL6	control	N/A	10:30:00	PPR disparity	12	24	12	8	0:00-10:00	0.549962	0.296731	0.0856588	15:00-25:00	0.446875	0.173468	0.0500759	93.277	46.2542	13.3524	Assume PPR disparity data is non-parametric					baseline vs control	Wilcoxon signed rank test	Z = 0.588, p = .556
	e		C57/BL6	MK801	50μM	10:30:00	PPR disparity	13	26	13	8	0:00-10:00	0.549852	0.271272	0.0752372	15:00-25:00	0.65342	0.509378	0.141276	120.183	61.3694	17.0208						baseline vs MK801	Wilcoxon signed rank test	Z = -0.909, p = .364
	f		C57/BL6	AP5	50μM	10:30:00	PPR disparity	12	24	12	6	0:00-10:00	0.530947	0.274977	0.079379	15:00-25:00	0.675701	0.351193	0.101381	152.406	102.745	29.6601						baseline vs AP5	Wilcoxon signed rank test	Z = -0.756, p = .456
* in the case of PPRs, normalized values are expressed as absolute change (Δ = after - before). Otherwise they are expressed as normalized to baseline (Δ = (after - before)/before), or % baseline ( = (after - before)/before *100).
