# Supplementary material for: Astrocyte GluN2C NMDA receptors control basal synaptic strengths of hippocampal CA1 pyramidal neurons in the stratum radiatum
Source: eLife journal article supplement (doi:10.7554/elife.70818), 2021-10-25
Supplement: supp [file elife_poa_e70818_Figure_3_figure_supplement_1_source_data_1.xlsx]

## Sheet: CNQX_DATA
2 mM	ni=loading intensity
	nf=unloaded intensity
ni	260.02	226.27	214.86	249.09	292.33	308.15	248.62	276.09	228.25	318.88	222.3	214.93	268.46	234.91	367.52	266.94	232.44	281.38	314.67	345.06	372.16	321.65	226.44	284.93	247.2	251.98	243.11	400.58	309.23	250.63	336.63	287.51	308.47	297.12	237.67	268.9	267.04	314.15	229.01	254.17	235.17	239.65	327.01	235.53	246.23	223.07	231.43	215.68	244.52
nf	240.11	209.51	210.47	231.31	257.1	276.38	230.8	237.25	215.59	288.56	206.37	196.3	246.53	214.81	337.28	235.63	201.62	236	272.99	308.69	308.67	279.21	206.23	240.83	213.22	214.85	211.78	323.75	256.85	216.07	280.67	247.64	250.2	238.46	200.56	239.49	227.41	258.37	195.44	242.32	221.1	220.89	291.02	214.91	222.33	196.96	206.69	202.43	218.46
subtract	19.91	16.76	4.39	17.78	35.23	31.77	17.82	38.84	12.66	30.32	15.93	18.63	21.93	20.1	30.24	31.31	30.82	45.38	41.68	36.37	63.49	42.44	20.21	44.1	33.98	37.13	31.33	76.83	52.38	34.56	55.96	39.87	58.27	58.66	37.11	29.41	39.63	55.78	33.57	11.85	14.07	18.76	35.99	20.62	23.9	26.11	24.74	13.25	26.06
% loading	7.6571	7.40708	2.04319	7.13798	12.0514	10.3099	7.16756	14.0679	5.54655	9.50828	7.16599	8.66794	8.16881	8.55647	8.22812	11.7292	13.2593	16.1277	13.2456	10.5402	17.0599	13.1945	8.9251	15.4775	13.746	14.7353	12.8872	19.1797	16.9388	13.7893	16.6236	13.8673	18.89	19.7429	15.6141	10.9372	14.8405	17.7558	14.6587	4.66223	5.98291	7.82808	11.0058	8.75472	9.70637	11.7048	10.6901	6.14336	10.6576
ni	219.48	168.99	222.44	183.41	219.01	201.75	174.98	203.67	193	202.77	198.41	193.1	196.02	190.91	198.35	189.85	219.57	177.72	195.25	194.7	205.68	169.57	187.72	226.05	196.94	221.41	193.99	173.38	217.63	218.48	180.83
nf	189.9	150.31	188.56	166.73	195.58	171.22	163.9	178.35	157.4	181.21	170.77	174.68	187.67	174.17	151.84	177.94	185.27	167.15	183.4	184.7	180.33	170.19	183.99	209.01	152.93	207.35	167.42	153.99	183.91	182.14	162.1
subtract	29.58	18.68	33.88	16.68	23.43	30.53	11.08	25.32	35.6	21.56	27.64	18.42	8.35	16.74	46.51	11.91	34.3	10.57	11.85	10	25.35	-0.62	3.73	17.04	44.01	14.06	26.57	19.39	33.72	36.34	18.73
% loading	13.4773	11.0539	15.2311	9.09438	10.6981	15.1326	6.33215	12.4319	18.4456	10.6327	13.9307	9.5391	4.25977	8.76853	23.4484	6.27337	15.6214	5.94756	6.06914	5.13611	12.325	-0.365631	1.987	7.53816	22.3469	6.35021	13.6966	11.1835	15.4942	16.6331	10.3578
ni	181.33	180.01	208.58	174.77	171.11	183.74	169.48	181.74	173.96	159.7	174.37	187.69	147.79	154.14	177.58	196.79	180.75	186.19	187.65	170.78	170.09	180.12	154.94	181.02	168.01	146.07	153.63	149.3	136.64	151.81	143.44	146.26	164.12	173	168.49	169.59	139.41	151.25	147.3	144.47	152.37	149.05	157.73	150.54	168.68	160	170.88	181.67	167.36
nf	166.73	164.54	184.23	153.84	152.64	161.31	154.15	153.77	155.02	137.17	175.19	181.63	140.6	160.58	175.22	189.53	167.31	166.15	177.47	154.77	157.38	159.58	149.7	173.74	148.43	134.69	136.79	139.11	128.85	146.83	133.96	140	158.57	152.7	165.41	162.79	135.41	145.65	135.86	138.83	140.86	141.42	147.22	144.86	156.04	154.98	153.38	149.79	160.48
subtract	14.6	15.47	24.35	20.93	18.47	22.43	15.33	27.97	18.94	22.53	-0.82	6.06	7.19	-6.44	2.36	7.26	13.44	20.04	10.18	16.01	12.71	20.54	5.24	7.28	19.58	11.38	16.84	10.19	7.79	4.98	9.48	6.26	5.55	20.3	3.08	6.8	4	5.6	11.44	5.64	11.51	7.63	10.51	5.68	12.64	5.02	17.5	31.88	6.88
% loading	8.05162	8.59397	11.6742	11.9757	10.7942	12.2075	9.04532	15.3901	10.8876	14.1077	-0.470264	3.22873	4.86501	-4.17802	1.32898	3.68921	7.43568	10.7632	5.42499	9.37463	7.47251	11.4035	3.38195	4.02166	11.6541	7.79079	10.9614	6.82518	5.70111	3.28042	6.60904	4.28005	3.38167	11.7341	1.828	4.00967	2.86923	3.70248	7.76646	3.90392	7.55398	5.11909	6.66329	3.77308	7.49348	3.1375	10.2411	17.5483	4.1109
ni	157.28	154.64	159.22	153.31	150.98	171.35	187.01	184.11	174.6	170.57	180.6	161.63	177.05	166.58	176.67	175.91	161.93	161.11	179.95	166.77	149.68	151.07	173.84	160.26	187.4	198.75	200.16	162.54	177.36	221.04	192.52	187.47	173.56	165	172.44	175.99	169.1	160.67	154.31	157.27	155.26	171.12	172.14	179.6	182.83	171.02	181.65	201.33	178.56
nf	155.22	150.77	145.09	142.09	140.69	157.14	160.15	160.63	152.69	152.22	147.89	144.56	150.53	157.64	144.32	162.22	158.6	149.9	160.07	154.3	139.84	151.37	144.23	143.32	156.78	188.04	169.81	147.74	148.49	156.73	163.01	151.68	155.75	156.05	161.93	157.42	142.63	153.12	154.33	146.43	147.65	146.47	149.86	147.99	149.52	153.79	162.69	151.59	161.58
subtract	2.06	3.87	14.13	11.22	10.29	14.21	26.86	23.48	21.91	18.35	32.71	17.07	26.52	8.94	32.35	13.69	3.33	11.21	19.88	12.47	9.84	-0.3	29.61	16.94	30.62	10.71	30.35	14.8	28.87	64.31	29.51	35.79	17.81	8.95	10.51	18.57	26.47	7.55	-0.02	10.84	7.61	24.65	22.28	31.61	33.31	17.23	18.96	49.74	16.98
% loading	1.30977	2.50259	8.87451	7.3185	6.81547	8.29297	14.3629	12.7532	12.5487	10.758	18.1118	10.5612	14.9788	5.36679	18.311	7.78239	2.05644	6.95798	11.0475	7.47736	6.57402	-0.198583	17.0329	10.5703	16.3394	5.38868	15.1629	9.10545	16.2776	29.0943	15.3283	19.0911	10.2616	5.42424	6.09487	10.5517	15.6535	4.69907	-0.0129609	6.89261	4.90146	14.4051	12.943	17.6002	18.2191	10.0748	10.4377	24.7057	9.50941
ni	148.57	295.6	289.98	356.42	225.62	268.77	249.73	209.36	205.38	208.42	338.51	209.96	277.58	264.27	233.3	190.33	247.15	192.96	246.4	252.93	244.31	285.91	252.32	239.72	252.63	275.43	193.52
nf	138.85	222.53	209.23	265.22	171.54	190.12	188.3	166.9	172.74	170.85	250.65	163.78	242.33	215.65	206.57	186.38	206.75	170.49	195.14	217.22	193.74	243.23	212.48	203.49	234.69	232.96	177.12
subtract	9.72	73.07	80.75	91.2	54.08	78.65	61.43	42.46	32.64	37.57	87.86	46.18	35.25	48.62	26.73	3.95	40.4	22.47	51.26	35.71	50.57	42.68	39.84	36.23	17.94	42.47	16.4
% loading	6.54237	24.7192	27.8467	25.5878	23.9695	29.2629	24.5986	20.2809	15.8925	18.0261	25.9549	21.9947	12.699	18.3979	11.4574	2.07534	16.3463	11.6449	20.8036	14.1185	20.6991	14.9278	15.7895	15.1135	7.10129	15.4195	8.47458
Subtracted
Cell#1	19.91	16.76	4.39	17.78	35.23	31.77	17.82	38.84	12.66	30.32	15.93	18.63	21.93	20.1	30.24	31.31	30.82	45.38	41.68	36.37	63.49	42.44	20.21	44.1	33.98	37.13	31.33	76.83	52.38	34.56	55.96	39.87	58.27	58.66	37.11	29.41	39.63	55.78	33.57	11.85	14.07	18.76	35.99	20.62	23.9	26.11	24.74	13.25	26.06
Cell#2	29.58	18.68	33.88	16.68	23.43	30.53	11.08	25.32	35.6	21.56	27.64	18.42	8.35	16.74	46.51	11.91	34.3	10.57	11.85	10	25.35	3.73	17.04	44.01	14.06	26.57	19.39	33.72	36.34	18.73
Cell#3	14.6	15.47	24.35	20.93	18.47	22.43	15.33	27.97	18.94	22.53	6.06	7.19	2.36	7.26	13.44	20.04	10.18	16.01	12.71	20.54	5.24	7.28	19.58	11.38	16.84	10.19	7.79	4.98	9.48	6.26	5.55	20.3	6.8	5.6	11.44	5.64	11.51	7.63	10.51	5.68	12.64	5.02	17.5	31.88	6.88	12.34	12.01	12.23	13.67
Cell#4	2.06	3.87	14.13	11.22	10.29	14.21	26.86	23.48	21.91	18.35	32.71	17.07	26.52	8.94	32.35	13.69	3.33	11.21	19.88	12.47	9.84	29.61	16.94	30.62	10.71	30.35	14.8	28.87	64.31	29.51	35.79	17.81	8.95	10.51	18.57	26.47	7.55	7.61	24.65	22.28	31.61	33.31	17.23	18.96	49.74	16.98	16.93	8.74	18.11
Cell#5	9.72	73.07	80.75	91.2	54.08	78.65	61.43	42.46	32.64	37.57	87.86	46.18	35.25	48.62	26.73	3.95	40.4	22.47	51.26	35.71	50.57	42.68	39.84	36.23	17.94	42.47	16.4
average	31.2915
count	550
% loading
Cell#1	7.6571	7.40708	2.04319	7.13798	12.0514	10.3099	7.16756	14.0679	5.54655	9.50828	7.16599	8.66794	8.16881	8.55647	8.22812	11.7292	13.2593	16.1277	13.2456	10.5402	17.0599	13.1945	8.9251	15.4775	13.746	14.7353	12.8872	19.1797	16.9388	13.7893	16.6236	13.8673	18.89	19.7429	15.6141	10.9372	14.8405	17.7558	14.6587	4.66223	5.98291	7.82808	11.0058	8.75472	9.70637	11.7048	10.6901	6.14336	10.6576
Cell#2	13.4773	11.0539	15.2311	9.09438	10.6981	15.1326	6.33215	12.4319	18.4456	10.6327	13.9307	9.5391	4.25977	8.76853	23.4484	6.27337	15.6214	5.94756	6.06914	5.13611	12.325	1.987	7.53816	22.3469	6.35021	13.6966	11.1835	15.4942	16.6331	10.3578
Cell#3	8.05162	8.59397	11.6742	11.9757	10.7942	12.2075	9.04532	15.3901	10.8876	14.1077	3.22873	4.86501	1.32898	3.68921	7.43568	10.7632	5.42499	9.37463	7.47251	11.4035	3.38195	4.02166	11.6541	7.79079	10.9614	6.82518	5.70111	3.28042	6.60904	4.28005	3.38167	11.7341	4.00967	3.70248	7.76646	3.90392	7.55398	5.11909	6.66329	3.77308	7.49348	3.1375	10.2411	17.5483	4.1109	7.65556	7.56631	7.8142	8.73427
Cell#4	1.30977	2.50259	8.87451	7.3185	6.81547	8.29297	14.3629	12.7532	12.5487	10.758	18.1118	10.5612	14.9788	5.36679	18.311	7.78239	2.05644	6.95798	11.0475	7.47736	6.57402	17.0329	10.5703	16.3394	5.38868	15.1629	9.10545	16.2776	29.0943	15.3283	19.0911	10.2616	5.42424	6.09487	10.5517	15.6535	4.69907	4.90146	14.4051	12.943	17.6002	18.2191	10.0748	10.4377	24.7057	9.50941	9.04622	4.89006	9.94181
Cell#5	6.54237	24.7192	27.8467	25.5878	23.9695	29.2629	24.5986	20.2809	15.8925	18.0261	25.9549	21.9947	12.699	18.3979	11.4574	2.07534	16.3463	11.6449	20.8036	14.1185	20.6991	14.9278	15.7895	15.1135	7.10129	15.4195	8.47458
Bins	Destaining intensity	Bins	% total pool		Destaining intensity	CTRL	Count	Cumulative Count	Percent	Cumulative Percent		% total pool	CTRL	Count	Cumulative Count	Percent	Cumulative Percent
0	19.91	0	7.6571			0 To 5	21	21	0.03818	0.03818			0 To 1	1	1	0.00182	0.00182
5	16.76	1	7.40708			5 To 10	43	64	0.07818	0.11636			1 To 2	9	10	0.01636	0.01818
10	4.39	2	2.04319			10 To 15	70	134	0.12727	0.24364			2 To 3	14	24	0.02545	0.04364
15	17.78	3	7.13798			15 To 20	64	198	0.11636	0.36			3 To 4	15	39	0.02727	0.07091
20	35.23	4	12.0514			20 To 25	48	246	0.08727	0.44727			4 To 5	16	55	0.02909	0.1
25	31.77	5	10.3099			25 To 30	43	289	0.07818	0.52545			5 To 6	24	79	0.04364	0.14364
30	17.82	6	7.16756			30 To 35	45	334	0.08182	0.60727			6 To 7	28	107	0.05091	0.19455
35	38.84	7	14.0679			35 To 40	48	382	0.08727	0.69455			7 To 8	36	143	0.06545	0.26
40	12.66	8	5.54655			40 To 45	40	422	0.07273	0.76727			8 To 9	32	175	0.05818	0.31818
45	30.32	9	9.50828			45 To 50	27	449	0.04909	0.81636			9 To 10	22	197	0.04	0.35818
50	15.93	10	7.16599			50 To 55	26	475	0.04727	0.86364			10 To 11	32	229	0.05818	0.41636
55	18.63	11	8.66794			55 To 60	27	502	0.04909	0.91273			11 To 12	41	270	0.07455	0.49091
60	21.93	12	8.16881			60 To 65	18	520	0.03273	0.94545			12 To 13	32	302	0.05818	0.54909
65	20.1	13	8.55647			65 To 70	9	529	0.01636	0.96182			13 To 14	31	333	0.05636	0.60545
70	30.24	14	8.22812			70 To 75	7	536	0.01273	0.97455			14 To 15	27	360	0.04909	0.65455
75	31.31	15	11.7292			75 To 80	6	542	0.01091	0.98545			15 To 16	25	385	0.04545	0.7
80	30.82	16	13.2593			80 To 85	3	545	0.00545	0.99091			16 To 17	28	413	0.05091	0.75091
85	45.38	17	16.1277			85 To 90	4	549	0.00727	0.99818			17 To 18	26	439	0.04727	0.79818
90	41.68	18	13.2456			90 To 95	1	550	0.00182	1			18 To 19	26	465	0.04727	0.84545
95	36.37	19	10.5402			95 To 100	0	550	0	1			19 To 20	19	484	0.03455	0.88
100	63.49	20	17.0599			100 To 105	0	550	0	1			20 To 21	18	502	0.03273	0.91273
105	42.44	21	13.1945			105 To 110	0	550	0	1			21 To 22	15	517	0.02727	0.94
110	20.21	22	8.9251			110 To 115	0	550	0	1			22 To 23	10	527	0.01818	0.95818
115	44.1	23	15.4775			115 To 120	0	550	0	1			23 To 24	8	535	0.01455	0.97273
120	33.98	24	13.746			120 To 125	0	550	0	1			24 To 25	6	541	0.01091	0.98364
125	37.13	25	14.7353			125 To 130	0	550	0	1			25 To 26	4	545	0.00727	0.99091
130	31.33	26	12.8872			130 To 135	0	550	0	1			26 To 27	1	546	0.00182	0.99273
135	76.83	27	19.1797			135 To 140	0	550	0	1			27 To 28	1	547	0.00182	0.99455
140	52.38	28	16.9388			140 To 145	0	550	0	1			28 To 29	0	547	0	0.99455
145	34.56	29	13.7893			145 To 150	0	550	0	1			29 To 30	2	549	0.00364	0.99818
150	55.96	30	16.6236			150 To 155	0	550	0	1			30 To 31	0	549	0	0.99818
155	39.87	31	13.8673			155 To 160	0	550	0	1			31 To 32	1	550	0.00182	1
160	58.27	32	18.89			160 To 165	0	550	0	1			32 To 33	0	550	0	1
165	58.66	33	19.7429			165 To 170	0	550	0	1			33 To 34	0	550	0	1
170	37.11	34	15.6141			170 To 175	0	550	0	1			34 To 35	0	550	0	1
175	29.41	35	10.9372			175 To 180	0	550	0	1			35 To 36	0	550	0	1
180	39.63	36	14.8405			180 To 185	0	550	0	1			36 To 37	0	550	0	1
185	55.78	37	17.7558			185 To 190	0	550	0	1			37 To 38	0	550	0	1
190	33.57	38	14.6587			190 To 195	0	550	0	1			38 To 39	0	550	0	1
195	11.85	39	4.66223			195 To 200	0	550	0	1			39 To 40	0	550	0	1
200	14.07	40	5.98291			200 and over	0	550	0	1			40 To 41	0	550	0	1
	18.76	41	7.82808										41 To 42	0	550	0	1
	35.99	42	11.0058										42 To 43	0	550	0	1
	20.62	43	8.75472										43 To 44	0	550	0	1
	23.9	44	9.70637										44 To 45	0	550	0	1
	26.11	45	11.7048										45 To 46	0	550	0	1
	24.74	46	10.6901										46 To 47	0	550	0	1
	13.25	47	6.14336										47 To 48	0	550	0	1
	26.06	48	10.6576										48 To 49	0	550	0	1
	38.62	49	11.9106										49 To 50	0	550	0	1
	22.05	50	7.81139										50 To 51	0	550	0	1
	36.66	51	12.1608										51 To 52	0	550	0	1
	6.99	52	2.76919										52 To 53	0	550	0	1
	20.9	53	8.99854										53 To 54	0	550	0	1
	32.33	54	12.5945										54 To 55	0	550	0	1
	17.45	55	8.59521										55 To 56	0	550	0	1
	26.75	56	11.818										56 To 57	0	550	0	1
	43.18	57	15.495										57 To 58	0	550	0	1
	40.03	58	15.1893										58 To 59	0	550	0	1
	43.27	59	14.3597										59 To 60	0	550	0	1
	26.37	60	12.1734										60 To 61	0	550	0	1
	29.49	61	12.6312										61 To 62	0	550	0	1
	29.88	62	12.4828										62 To 63	0	550	0	1
	22.25	63	9.21211										63 To 64	0	550	0	1
	34.47	64	13.2904										64 To 65	0	550	0	1
	13.14	65	5.74376										65 To 66	0	550	0	1
	43.05	66	17.2345										66 To 67	0	550	0	1
	36.28	67	14.0441										67 To 68	0	550	0	1
	29.12	68	11.9697										68 To 69	0	550	0	1
	24.87	69	11.568										69 To 70	0	550	0	1
	19.9	70	8.02128
	48.79		15.0262
	59.15		19.5991
	27.18		8.18576
	29.53		11.0215
	29.34		10.5195
	36.96		12.4642
	32.37		10.5464
	16.7		6.42283
	38.61		13.9978
	33.63		11.6512
	17.5		7.03744
	36.45		14.087
	40.78		14.9937
	28.68		11.2444
	39.41		14.6245
	29.38		11.396
	37.56		13.3116
	37.2		12.076
	56.92		18.0224
	48.93		17.8714
	27.26		11.681
	29.61		13.7811
	33.54		13.2842
	43.24		16.2245
	54.22		19.1577
	47.69		13.8208
	40.75		16.611
	32.37		12.8892
	53.43		16.2862
	37.16		12.7878
	29.99		13.1144
	33.97		13.6481
	40.91		14.8338
	53.82		18.748
	48.26		19.0826
	19.76		8.55374
	31.08		13.2306
	66.44		20.5322
	88.42		31.2262
	32.51		13.1513
	42.23		15.4113
	35.83		13.748
	47.14		18.0475
	35.35		13.38
	25.24		11.6717
	45.56		16.53
	25.66		12.3188
	28.46		10.7624
	52.76		19.3622
	36.77		11.3913
	56.7		17.8156
	48.01		14.9197
	74.58		23.7796
	71.22		20.4626
	57.33		19.5319
	58.54		20.7126
	37.29		14.1261
	61.76		20.796
	54.5		18.6064
	49.66		19.1886
	88.68		26.6194
	31.3		11.9498
	27.18		10.1695
	21.53		9.18202
	14.99		6.16086
	37.62		12.4921
	32.23		13.3524
	29.91		13.0304
	21.51		9.83404
	43.83		17.9897
	35.46		15.0656
	42.02		16.735
	55.15		18.3974
	64.87		23.2559
	70.45		24.102
	36.79		14.3476
	57.63		21.3729
	52.87		20.0638
	38.44		14.6483
	31.01		13.305
	42.61		17.2818
	45.46		16.8215
	42.91		16.2538
	46.93		17.9095
	59.11		21.8578
	37.93		16.851
	43.34		17.6963
	70.34		21.33
	77.19		20.8048
	54.44		18.3547
	40.71		14.9664
	58.1		22.1544
	55.71		21.2277
	47.05		16.9751
	41.54		17.8444
	32.9		13.4308
	43.28		17.4256
	45.85		17.0168
	65.01		20.4164
	40.18		16.3573
	47.87		19.2303
	42.66		15.7487
	48.48		16.2963
	53.11		19.338
	49.08		17.0987
	46.49		19.6775
	44.84		13.4256
	57.11		17.4782
	74.79		22.1988
	52.36		17.7083
	52.14		15.8201
	58.16		20.6278
	53.22		18.7924
	82.03		23.5827
	39.96		16.2399
	64.67		20.2423
	77.44		22.8767
	52.12		18.5692
	80.17		25.2607
	88.61		24.7756
	68.36		20.768
	69.76		21.9945
	26.84		11.2376
	77.92		25.1574
	61.76		18.4761
	60.81		19.6073
	50.29		18.6011
	36.74		12.9494
	48.22		20.0641
	25.76		11.1125
	43.96		17.53
	51.73		19.913
	67.84		23.4497
	68.88		22.9165
	43.84		16.0627
	63.6		21.4307
	48.69		15.8182
	42.71		15.7474
	59.12		21.8995
	55.66		18.9959
	32.42		10.8294
	60.82		22.8432
	59.06		20.4813
	58.96		23.2694
	37.73		16.1543
	21.05		8.5712
	55.04		21.0325
	42.26		17.2307
	18.96		8.41956
	33.24		15.7119
	39.4		17.5736
	29.2		12.6489
	58.87		17.8871
	55.47		16.3933
	52.49		18.6075
	55.43		19.6484
	71.71		21.7851
	37.38		12.6931
	38.18		11.6271
	37.33		12.7424
	60.45		18.71
	44.31		13.3512
	23.12		7.63515
	68.47		21.1366
	49.65		13.1537
	22.25		11.1056
	24.01		12.0872
	39.37		14.2919
	22.15		9.03271
	30.58		10.9901
	60		18.5816
	44.71		16.7259
	55.15		16.3195
	37.17		14.322
	14.55		7.04635
	69.36		20.0747
	37.05		15.7098
	62.26		19.57
	32.69		12.6882
	42.93		12.2805
	61.57		21.108
	46.69		18.8137
	60.08		19.9092
	78.36		24.1464
	53.34		18.1324
	66.7		22.9044
	56.63		18.0471
	45.27		16.8065
	54.59		21.9917
	53.15		22.0631
	63.1		23.2704
	50.78		20.4297
	63.92		22.0482
	31.66		12.2533
	64.91		21.623
	52.64		18.8134
	41.07		16.6985
	17.52		7.42184
	40.73		17.5334
	57.9		19.7989
	4.93		2.02456
	5.09		2.2142
	13.41		6.2317
	8.05		3.63579
	11.83		5.22527
	2.72		1.25502
	4.56		2.4209
	3.24		1.77359
	6.31		2.85378
	9.91		4.37103
	3.45		1.33333
	5.71		2.90556
	13.05		6.66394
	4.63		2.22757
	7.55		3.72619
	23.57		9.6208
	11.37		5.45376
	4.15		2.14382
	3.52		1.47416
	17.63		7.0568
	43.5		10.6318
	52.27		11.6464
	18.42		3.20092
	30.64		9.28147
	48.71		14.0626
	30.74		11.4211
	24.48		9.48249
	7.78		3.61491
	12.26		5.03449
	11		5.10393
	8.03		3.03305
	29.52		12.9633
	4.04		1.80906
	9.42		5.03905
	43.32		18.8438
	12.4		6.50509
	20.15		10.1639
	12.99		7.54093
	22.45		8.5638
	13.58		6.21084
	9.61		4.96
	22.55		10.7874
	24.89		11.3085
	23.58		10.2669
	11		5.66456
	31.02		13.8873
	15.26		7.81162
	16.89		8.68291
	24.46		11.8836
	21.57		11.5514
	17.9		8.9308
	30.1		14.832
	14.68		7.80685
	29.24		14.1304
	9.03		4.44455
	18.03		8.46439
	26.95		11.2568
	12.68		6.49324
	9.66		5.21767
	50.28		17.6812
	25.93		13.206
	14.16		7.50795
	17.68		9.14877
	10.28		4.77762
	15.13		6.96882
	15.99		5.84451
	18.37		6.54972
	5.98		2.696
	10.13		4.17164
	20.75		8.84484
	16.73		7.46209
	3.7		1.66143
	10.38		4.65429
	0.73		0.343142
	14.97		7.75929
	12.91		7.14483
	24.36		12.712
	29.58		13.4773
	18.68		11.0539
	33.88		15.2311
	16.68		9.09438
	23.43		10.6981
	30.53		15.1326
	11.08		6.33215
	25.32		12.4319
	35.6		18.4456
	21.56		10.6327
	27.64		13.9307
	18.42		9.5391
	8.35		4.25977
	16.74		8.76853
	46.51		23.4484
	11.91		6.27337
	34.3		15.6214
	10.57		5.94756
	11.85		6.06914
	10		5.13611
	25.35		12.325
	3.73		1.987
	17.04		7.53816
	44.01		22.3469
	14.06		6.35021
	26.57		13.6966
	19.39		11.1835
	33.72		15.4942
	36.34		16.6331
	18.73		10.3578
	14.6		8.05162
	15.47		8.59397
	24.35		11.6742
	20.93		11.9757
	18.47		10.7942
	22.43		12.2075
	15.33		9.04532
	27.97		15.3901
	18.94		10.8876
	22.53		14.1077
	6.06		3.22873
	7.19		4.86501
	2.36		1.32898
	7.26		3.68921
	13.44		7.43568
	20.04		10.7632
	10.18		5.42499
	16.01		9.37463
	12.71		7.47251
	20.54		11.4035
	5.24		3.38195
	7.28		4.02166
	19.58		11.6541
	11.38		7.79079
	16.84		10.9614
	10.19		6.82518
	7.79		5.70111
	4.98		3.28042
	9.48		6.60904
	6.26		4.28005
	5.55		3.38167
	20.3		11.7341
	6.8		4.00967
	5.6		3.70248
	11.44		7.76646
	5.64		3.90392
	11.51		7.55398
	7.63		5.11909
	10.51		6.66329
	5.68		3.77308
	12.64		7.49348
	5.02		3.1375
	17.5		10.2411
	31.88		17.5483
	6.88		4.1109
	12.34		7.65556
	12.01		7.56631
	12.23		7.8142
	13.67		8.73427
	9.19		5.60127
	2.06		1.30977
	3.87		2.50259
	14.13		8.87451
	11.22		7.3185
	10.29		6.81547
	14.21		8.29297
	26.86		14.3629
	23.48		12.7532
	21.91		12.5487
	18.35		10.758
	32.71		18.1118
	17.07		10.5612
	26.52		14.9788
	8.94		5.36679
	32.35		18.311
	13.69		7.78239
	3.33		2.05644
	11.21		6.95798
	19.88		11.0475
	12.47		7.47736
	9.84		6.57402
	29.61		17.0329
	16.94		10.5703
	30.62		16.3394
	10.71		5.38868
	30.35		15.1629
	14.8		9.10545
	28.87		16.2776
	64.31		29.0943
	29.51		15.3283
	35.79		19.0911
	17.81		10.2616
	8.95		5.42424
	10.51		6.09487
	18.57		10.5517
	26.47		15.6535
	7.55		4.69907
	7.61		4.90146
	24.65		14.4051
	22.28		12.943
	31.61		17.6002
	33.31		18.2191
	17.23		10.0748
	18.96		10.4377
	49.74		24.7057
	16.98		9.50941
	16.93		9.04622
	8.74		4.89006
	18.11		9.94181
	10.15		6.00237
	13.4		7.54972
	14.14		8.06617
	10.93		6.34506
	18.71		12.0213
	10.49		6.12447
	20.81		11.944
	12.18		6.76704
	19.13		11.395
	8.88		5.7472
	13.74		8.43929
	15.89		9.29783
	15.97		8.39642
	21.69		11.9907
	22.63		12.6453
	35.58		19.9238
	17.79		10.6853
	12.59		7.54751
	15.45		8.68319
	8.83		5.7416
	42.98		22.5003
	20.16		11.6491
	34.59		17.295
	30.13		16.575
	24.4		14.2457
	38.85		21.7879
	23.8		13.7899
	29.31		17.3155
	16.91		9.84456
	11.04		6.74693
	10.27		6.80132
	18.56		11.4307
	8.78		5.61273
	14.47		9.84019
	4.18		2.57342
	14.16		8.45727
	4.76		3.16468
	13.69		8.63777
	12.15		7.59565
	8.96		5.85162
	28.15		16.0472
	37.46		20.2717
	19.51		10.3348
	16.09		9.23704
	13.97		8.06489
	19.86		11.0684
	9.72		6.54237
	73.07		24.7192
	80.75		27.8467
	91.2		25.5878
	54.08		23.9695
	78.65		29.2629
	61.43		24.5986
	42.46		20.2809
	32.64		15.8925
	37.57		18.0261
	87.86		25.9549
	46.18		21.9947
	35.25		12.699
	48.62		18.3979
	26.73		11.4574
	3.95		2.07534
	40.4		16.3463
	22.47		11.6449
	51.26		20.8036
	35.71		14.1185
	50.57		20.6991
	42.68		14.9278
	39.84		15.7895
	36.23		15.1135
	17.94		7.10129
	42.47		15.4195
	16.4		8.47458
[truncated: 324 more columns]

## Sheet: CNQX+AP5_DATA
		synapse#
		1	2	3	4	5	6	…
Cell#1	ni	248.23	244.44	225.2	218.8	217.94	228.41	227.98	230.26	246.8	233.93	246.95	231.99	230.27	224.04	224.53	264.95	231.65	213.79	241.16	243.35	244.69	240.89	226.02	233.52	220	211.48	220.56	203.01	210.4	210.02	198.72	221.27	214.99	199.57	208.36	197.83	207.3	215.09	222.15	208.58	204.59	210.9	205.33	200.99	199.99	225.49	193.65	194.52
	nf	217.73	216.42	209.57	199.59	208.67	217.88	203.63	220.62	213.1	219.19	211.2	213.44	211.59	207.44	201.06	226.25	214.6	194.27	207.94	231.14	208.63	223.58	206.12	206.79	197.86	196.56	196.68	194.73	193.09	189.6	189.56	199.14	195.67	196.38	191.53	184.98	185.3	193.69	193.4	196.27	187.89	196.63	190.8	184.42	185.36	204.27	181.3	191.89
	subtract	30.5	28.02	15.63	19.21	9.27	10.53	24.35	9.64	33.7	14.74	35.75	18.55	18.68	16.6	23.47	38.7	17.05	19.52	33.22	12.21	36.06	17.31	19.9	26.73	22.14	14.92	23.88	8.28	17.31	20.42	9.16	22.13	19.32	3.19	16.83	12.85	22	21.4	28.75	12.31	16.7	14.27	14.53	16.57	14.63	21.22	12.35	2.63
	% loading	12.287	11.4629	6.9405	8.77971	4.25346	4.61013	10.6808	4.18657	13.6548	6.30103	14.4766	7.99603	8.11222	7.40939	10.4529	14.6065	7.36024	9.13046	13.7751	5.01746	14.737	7.18585	8.80453	11.4466	10.0636	7.05504	10.827	4.07862	8.22719	9.72288	4.6095	10.0014	8.98646	1.59844	8.07737	6.49548	10.6126	9.94932	12.9417	5.90181	8.16267	6.76624	7.07641	8.24419	7.31537	9.41062	6.37749	1.35205
Cell#2	ni	176.93	165.57	158.05	171.57	168.33	214.59	207.44	174.88	218.02	182.42	150.58	163.78	162.95	178.98	149.41	155.3	163.31	150.63	169.2	170.35	196.16	193.56	155.79	177.9	206.53	209.95	202.49	186.44	176.86	199.53	172.9	168.67	164.31	166.51	230.81	217.74	153.31	158.56	175.58	179.12	164.99	177.32	179.98	179.91	158.43	179.58	203.89	166.74
	nf	151.17	142.4	136.07	152.25	144.14	184.04	174.59	151.01	166.99	160.05	134.4	135.83	133.62	141.74	136.85	134.05	148.49	139.44	148.56	158.49	166.7	170.32	143.74	159.09	187.1	188.1	175.28	174.75	168.44	156.2	153.93	152.58	140.62	142.1	185.58	184.2	137.26	135.37	153.56	134.68	131.14	140.58	145.6	144.43	136.59	174.41	219.75	148.23
	subtract	25.76	23.17	21.98	19.32	24.19	30.55	32.85	23.87	51.03	22.37	16.18	27.95	29.33	37.24	12.56	21.25	14.82	11.19	20.64	11.86	29.46	23.24	12.05	18.81	19.43	21.85	27.21	11.69	8.42	43.33	18.97	16.09	23.69	24.41	45.23	33.54	16.05	23.19	22.02	44.44	33.85	36.74	34.38	35.48	21.84	5.17	-15.86	18.51
	% loading	14.5594	13.9941	13.907	11.2607	14.3706	14.2365	15.8359	13.6494	23.4061	12.2629	10.7451	17.0656	17.9994	20.8068	8.4064	13.6832	9.07477	7.4288	12.1986	6.96214	15.0184	12.0066	7.73477	10.5734	9.40783	10.4072	13.4377	6.27011	4.76083	21.716	10.9717	9.53934	14.4179	14.6598	19.5962	15.4037	10.469	14.6254	12.5413	24.8102	20.5164	20.7196	19.1021	19.721	13.7853	2.87894	-7.7787	11.1011
Cell#3	ni	162.06	195.04	147.95	167.05	170.11	159.67	156.28	196.06	193.43	220.68	156.43	156.26	170.7	186.16	178.1	163.85	160.33	174.9	156.8	162.73	159.01	153.69	170.7	162.89	153.04	141.63	160.41	141.93	155.99	156.57	160.27	158.09	179.51	152.11	162.12	168.59	174.62	165.64	170.53	216.49	171.72	144.49	136.78	141.46	149.23	158.11	187.73	172.8
	nf	144.57	159.21	143.2	147.94	145.11	153.07	145.58	155.47	148.59	179.49	147.35	141.15	149.99	147.42	159.31	154.12	146.62	151.01	144.91	167.86	147.79	148.63	148.9	144.77	144.27	134.65	141.89	134.68	132.7	136.07	139.26	135.86	170.33	145.1	132.95	167.01	153.78	158.32	153.63	191.6	161.22	134.37	133.07	127.54	133.77	132.99	168.93	160.8
	subtract	17.49	35.83	4.75	19.11	25	6.6	10.7	40.59	44.84	41.19	9.08	15.11	20.71	38.74	18.79	9.73	13.71	23.89	11.89	-5.13	11.22	5.06	21.8	18.12	8.77	6.98	18.52	7.25	23.29	20.5	21.01	22.23	9.18	7.01	29.17	1.58	20.84	7.32	16.9	24.89	10.5	10.12	3.71	13.92	15.46	25.12	18.8	12
	% loading	10.7923	18.3706	3.21054	11.4397	14.6964	4.13353	6.84669	20.7028	23.1815	18.665	5.80451	9.66978	12.1324	20.8101	10.5503	5.93836	8.55111	13.6592	7.58291	-3.15246	7.05616	3.29234	12.7709	11.1241	5.73053	4.92833	11.5454	5.10815	14.9304	13.0932	13.1091	14.0616	5.11392	4.60851	17.9928	0.937185	11.9345	4.41922	9.91028	11.4971	6.11461	7.00394	2.71238	9.84024	10.3598	15.8877	10.0144	6.94444
Cell#4	ni	238.01	277.53	255.68	277.42	241.36	203.98	247.91	251.01	260.72	224.11	227.04	194.67	210.91	174.44	163.48	182.75	186.98	177.36	158.57	167.88	172.62	164.1	181.57	149.77	168.67	153.06	160.44	150.02	170.59	165.73	157.27	212.28	224.9	216.98	224.41	200.7	225.68	229.16	213.53	232.85	222.54	199.62	183.11	173.22	174.42	174.28	178.22	165.74
	nf	183.65	178.48	191.72	201.65	177.86	153	170.54	149.06	227.68	171.15	166.53	146.25	149.28	136.25	139.53	143.43	144.99	144.07	132.93	131.77	143.41	139.07	135.88	126.04	133.62	127.89	127.25	132.27	148.27	128.69	125.12	153.93	178.89	173.49	159.16	150.09	188.56	195.05	157.22	160	161.84	161.88	161.31	140.21	150.04	142.77	139.42	131.07
	subtract	54.36	99.05	63.96	75.77	63.5	50.98	77.37	101.95	33.04	52.96	60.51	48.42	61.63	38.19	23.95	39.32	41.99	33.29	25.64	36.11	29.21	25.03	45.69	23.73	35.05	25.17	33.19	17.75	22.32	37.04	32.15	58.35	46.01	43.49	65.25	50.61	37.12	34.11	56.31	72.85	60.7	37.74	21.8	33.01	24.38	31.51	38.8	34.67
	% loading	22.8394	35.6898	25.0156	27.3124	26.3092	24.9926	31.2089	40.6159	12.6726	23.6313	26.6517	24.8729	29.221	21.8929	14.6501	21.5157	22.4569	18.7697	16.1695	21.5094	16.9216	15.2529	25.1638	15.8443	20.7802	16.4445	20.6869	11.8318	13.084	22.3496	20.4426	27.4873	20.458	20.0433	29.0762	25.2167	16.4481	14.8848	26.371	31.2862	27.276	18.9059	11.9054	19.0567	13.9778	18.0801	21.7708	20.9183
Cell#5	ni	195.27	206.75	212.01	208.44	187.46	189.36	231.33	215.14	208.14	226.11	203.9	223.33	198.47	216.11	183.99	213.05	219.35	202.91	212.8	191.78	183.58	218.19	218.99	200.88	202.99	142.96	174.9	196.83	178.02	158.11	166.41	180.22	230.68	184.06	189.84	200.48	150.06	142.68	205.23	177.84	216.8	172.21	250.52	185.84	169.64	169.51	210.65	185.4
	nf	165.41	184.57	164.53	175.2	167.42	151.73	172.02	167.44	155.12	183.83	165.35	179.01	169.73	177.42	168.54	178.77	181	154.44	163.67	172.16	160.51	174.06	166.06	155.53	174.32	140.4	161.56	182.91	153.9	144.7	156.38	140.19	200.99	150.91	164.56	186.04	141.84	135.43	151.89	136.42	196.74	152.86	208.27	158.22	157.8	154.79	150.6	156.95
	subtract	29.86	22.18	47.48	33.24	20.04	37.63	59.31	47.7	53.02	42.28	38.55	44.32	28.74	38.69	15.45	34.28	38.35	48.47	49.13	19.62	23.07	44.13	52.93	45.35	28.67	2.56	13.34	13.92	24.12	13.41	10.03	40.03	29.69	33.15	25.28	14.44	8.22	7.25	53.34	41.42	20.06	19.35	42.25	27.62	11.84	14.72	60.05	28.45
	% loading	15.2916	10.7279	22.3952	15.947	10.6903	19.8722	25.6387	22.1716	25.4732	18.6989	18.9063	19.8451	14.4808	17.9029	8.3972	16.0901	17.4835	23.8874	23.0874	10.2305	12.5667	20.2255	24.1701	22.5757	14.1238	1.79071	7.62722	7.07209	13.549	8.48144	6.02728	22.2117	12.8706	18.0104	13.3165	7.20271	5.47781	5.0813	25.9904	23.2906	9.25277	11.2363	16.8649	14.8622	6.97949	8.68385	28.507	15.3452
Cell#6	ni	211.09	257.56	176.02	164.3	178.42	188.78	226.38	162.64	172.67	166.17	178.62	203.12	192.43	186.4	182.1	207.49	176.88	176.27	177.36	172.14	178.7	183.6	176.48	190.74	197.58	220.48	233.89	187.12	265.47	194.63	194.43	164.2	182.26	176.86	182.17	182.25	200.62	221.65	207.85	198.93	207.9	225.14	225.64	199.48	174.63	173.89	192.11	184.48
	nf	171.94	154.83	162.65	145.74	156.79	165.6	155.44	134.73	141.06	143.22	133.81	168.81	153.96	167.96	159.44	164.64	152.16	149.57	155.65	147.07	134.33	165.1	157.77	149.57	132.89	143.26	193.22	142.32	136.22	146.38	136.46	137.83	150.06	135.3	156.27	158.09	168.59	156.17	174.88	138.27	162.21	159.19	160.93	153.25	153.37	161.54	134.62	141.99
	subtract	39.15	102.73	13.37	18.56	21.63	23.18	70.94	27.91	31.61	22.95	44.81	34.31	38.47	18.44	22.66	42.85	24.72	26.7	21.71	25.07	44.37	18.5	18.71	41.17	64.69	77.22	40.67	44.8	129.25	48.25	57.97	26.37	32.2	41.56	25.9	24.16	32.03	65.48	32.97	60.66	45.69	65.95	64.71	46.23	21.26	12.35	57.49	42.49
	% loading	18.5466	39.8859	7.59573	11.2964	12.1231	12.2788	31.3367	17.1606	18.3066	13.8112	25.0868	16.8915	19.9917	9.8927	12.4437	20.6516	13.9756	15.1472	12.2406	14.5637	24.8293	10.0763	10.6018	21.5844	32.7412	35.0236	17.3885	23.9419	48.6872	24.7906	29.8154	16.0597	17.6671	23.4988	14.2175	13.2565	15.9655	29.5421	15.8624	30.4931	21.9769	29.2929	28.6784	23.1753	12.1743	7.10219	29.9256	23.0323
Subtracted
Cell#1	30.5	28.02	15.63	19.21	9.27	10.53	24.35	9.64	33.7	14.74	35.75	18.55	18.68	16.6	23.47	38.7	17.05	19.52	33.22	12.21	36.06	17.31	19.9	26.73	22.14	14.92	23.88	8.28	17.31	20.42	9.16	22.13	19.32	3.19	16.83	12.85	22	21.4	28.75	12.31	16.7	14.27	14.53	16.57	14.63	21.22	12.35	32.45	27.23
Cell#2	25.76	23.17	21.98	19.32	24.19	30.55	32.85	23.87	51.03	22.37	16.18	27.95	29.33	37.24	12.56	21.25	14.82	11.19	20.64	11.86	29.46	23.24	12.05	18.81	19.43	21.85	27.21	11.69	8.42	43.33	18.97	16.09	23.69	24.41	45.23	33.54	16.05	23.19	22.02	44.44	33.85	36.74	34.38	35.48	21.84	18.51	25.31	8.72	20.2
Cell#3	17.49	35.83	19.11	25	10.7	40.59	44.84	41.19	9.08	15.11	20.71	38.74	18.79	9.73	13.71	23.89	11.89	11.22	21.8	18.12	8.77	18.52	23.29	20.5	21.01	22.23	9.18	29.17	20.84	16.9	24.89	10.5	10.12	13.92	15.46	25.12	18.8	12	9.27	6.79
Cell#4	54.36	99.05	63.96	75.77	63.5	50.98	77.37	101.95	33.04	52.96	60.51	48.42	61.63	38.19	23.95	39.32	41.99	33.29	25.64	36.11	29.21	25.03	45.69	23.73	35.05	25.17	33.19	17.75	22.32	37.04	32.15	58.35	46.01	43.49	65.25	50.61	37.12	34.11	56.31	72.85	60.7	37.74	21.8	33.01	24.38	31.51	38.8	34.67
Cell#5	29.86	22.18	47.48	33.24	20.04	37.63	59.31	47.7	53.02	42.28	38.55	44.32	28.74	38.69	15.45	34.28	38.35	48.47	49.13	19.62	23.07	44.13	52.93	45.35	28.67	13.34	13.92	24.12	13.41	10.03	40.03	29.69	33.15	25.28	14.44	8.22	53.34	41.42	20.06	19.35	42.25	27.62	11.84	14.72	60.05	28.45	39.2	19.85	23.16
Cell#6	39.15	102.73	13.37	18.56	21.63	23.18	70.94	27.91	31.61	22.95	44.81	34.31	38.47	18.44	22.66	42.85	24.72	26.7	21.71	25.07	44.37	18.5	18.71	41.17	64.69	77.22	40.67	44.8	129.25	48.25	57.97	26.37	32.2	41.56	25.9	24.16	32.03	65.48	32.97	60.66	45.69	65.95	64.71	46.23	21.26	12.35	57.49	42.49	52.97
average	31.0595
count	362
% loading
Cell#1	12.287	11.4629	6.9405	8.77971	4.25346	4.61013	10.6808	4.18657	13.6548	6.30103	14.4766	7.99603	8.11222	7.40939	10.4529	14.6065	7.36024	9.13046	13.7751	5.01746	14.737	7.18585	8.80453	11.4466	10.0636	7.05504	10.827	4.07862	8.22719	9.72288	4.6095	10.0014	8.98646	1.59844	8.07737	6.49548	10.6126	9.94932	12.9417	5.90181	8.16267	6.76624	7.07641	8.24419	7.31537	9.41062	6.37749	14.3909	11.4701
Cell#2	14.5594	13.9941	13.907	11.2607	14.3706	14.2365	15.8359	13.6494	23.4061	12.2629	10.7451	17.0656	17.9994	20.8068	8.4064	13.6832	9.07477	7.4288	12.1986	6.96214	15.0184	12.0066	7.73477	10.5734	9.40783	10.4072	13.4377	6.27011	4.76083	21.716	10.9717	9.53934	14.4179	14.6598	19.5962	15.4037	10.469	14.6254	12.5413	24.8102	20.5164	20.7196	19.1021	19.721	13.7853	11.1011	12.8275	5.40775	11.5402
Cell#3	10.7923	18.3706	11.4397	14.6964	6.84669	20.7028	23.1815	18.665	5.80451	9.66978	12.1324	20.8101	10.5503	5.93836	8.55111	13.6592	7.58291	7.05616	12.7709	11.1241	5.73053	11.5454	14.9304	13.0932	13.1091	14.0616	5.11392	17.9928	11.9345	9.91028	11.4971	6.11461	7.00394	9.84024	10.3598	15.8877	10.0144	6.94444	6.59223	5.03373
Cell#4	22.8394	35.6898	25.0156	27.3124	26.3092	24.9926	31.2089	40.6159	12.6726	23.6313	26.6517	24.8729	29.221	21.8929	14.6501	21.5157	22.4569	18.7697	16.1695	21.5094	16.9216	15.2529	25.1638	15.8443	20.7802	16.4445	20.6869	11.8318	13.084	22.3496	20.4426	27.4873	20.458	20.0433	29.0762	25.2167	16.4481	14.8848	26.371	31.2862	27.276	18.9059	11.9054	19.0567	13.9778	18.0801	21.7708	20.9183
Cell#5	15.2916	10.7279	22.3952	15.947	10.6903	19.8722	25.6387	22.1716	25.4732	18.6989	18.9063	19.8451	14.4808	17.9029	8.3972	16.0901	17.4835	23.8874	23.0874	10.2305	12.5667	20.2255	24.1701	22.5757	14.1238	7.62722	7.07209	13.549	8.48144	6.02728	22.2117	12.8706	18.0104	13.3165	7.20271	5.47781	25.9904	23.2906	9.25277	11.2363	16.8649	14.8622	6.97949	8.68385	28.507	15.3452	21.999	9.43038	11.9845
Cell#6	18.5466	39.8859	7.59573	11.2964	12.1231	12.2788	31.3367	17.1606	18.3066	13.8112	25.0868	16.8915	19.9917	9.8927	12.4437	20.6516	13.9756	15.1472	12.2406	14.5637	24.8293	10.0763	10.6018	21.5844	32.7412	35.0236	17.3885	23.9419	48.6872	24.7906	29.8154	16.0597	17.6671	23.4988	14.2175	13.2565	15.9655	29.5421	15.8624	30.4931	21.9769	29.2929	28.6784	23.1753	12.1743	7.10219	29.9256	23.0323	27.1335
Bins	Destaining intensity	Bins	% total pool		Destaining intensity	AP5	Count	Cumulative Count	Percent	Cumulative Percent		% total pool	16.7	Count	Cumulative Count	Percent	Cumulative Percent
0	30.5	0	12.287			3 To 5	1	1	0.00276	0.00276			0 To 1	0	0	0	0
5	28.02	1	11.4629			5 To 10	13	14	0.03591	0.03867			1 To 2	1	1	0.00276	0.00276
10	15.63	2	6.9405			10 To 15	40	54	0.1105	0.14917			2 To 3	0	1	0	0.00276
15	19.21	3	8.77971			15 To 20	53	107	0.14641	0.29558			3 To 4	0	1	0	0.00276
20	9.27	4	4.25346			20 To 25	65	172	0.17956	0.47514			4 To 5	6	7	0.01657	0.01934
25	10.53	5	4.61013			25 To 30	38	210	0.10497	0.58011			5 To 6	10	17	0.02762	0.04696
30	24.35	6	10.6808			30 To 35	39	249	0.10773	0.68785			6 To 7	15	32	0.04144	0.0884
35	9.64	7	4.18657			35 To 40	29	278	0.08011	0.76796			7 To 8	18	50	0.04972	0.13812
40	33.7	8	13.6548			40 To 45	23	301	0.06354	0.83149			8 To 9	16	66	0.0442	0.18232
45	14.74	9	6.30103			45 To 50	15	316	0.04144	0.87293			9 To 10	15	81	0.04144	0.22376
50	35.75	10	14.4766			50 To 55	10	326	0.02762	0.90055			10 To 11	21	102	0.05801	0.28177
55	18.55	11	7.99603			55 To 60	5	331	0.01381	0.91436			11 To 12	22	124	0.06077	0.34254
60	18.68	12	8.11222			60 To 65	11	342	0.03039	0.94475			12 To 13	23	147	0.06354	0.40608
65	16.6	13	7.40939			65 To 70	8	350	0.0221	0.96685			13 To 14	26	173	0.07182	0.4779
70	23.47	14	10.4529			70 To 75	3	353	0.00829	0.97514			14 To 15	24	197	0.0663	0.5442
75	38.7	15	14.6065			75 To 80	3	356	0.00829	0.98343			15 To 16	15	212	0.04144	0.58564
80	17.05	16	7.36024			80 To 85	0	356	0	0.98343			16 To 17	14	226	0.03867	0.62431
85	19.52	17	9.13046			85 To 90	0	356	0	0.98343			17 To 18	13	239	0.03591	0.66022
90	33.22	18	13.7751			90 To 95	1	357	0.00276	0.98619			18 To 19	14	253	0.03867	0.6989
95	12.21	19	5.01746			95 To 100	1	358	0.00276	0.98895			19 To 20	11	264	0.03039	0.72928
100	36.06	20	14.737			100 To 105	3	361	0.00829	0.99724			20 To 21	17	281	0.04696	0.77624
105	17.31	21	7.18585			105 To 110	0	361	0	0.99724			21 To 22	10	291	0.02762	0.80387
110	19.9	22	8.80453			110 To 115	0	361	0	0.99724			22 To 23	11	302	0.03039	0.83425
115	26.73	23	11.4466			115 To 120	0	361	0	0.99724			23 To 24	10	312	0.02762	0.86188
120	22.14	24	10.0636			120 To 125	0	361	0	0.99724			24 To 25	6	318	0.01657	0.87845
125	14.92	25	7.05504			125 To 130	1	362	0.00276	1			25 To 26	8	326	0.0221	0.90055
130	23.88	26	10.827			130 To 135	0	362	0	1			26 To 27	4	330	0.01105	0.9116
135	8.28	27	4.07862			135 To 140	0	362	0	1			27 To 28	6	336	0.01657	0.92818
140	17.31	28	8.22719			140 To 145	0	362	0	1			28 To 29	2	338	0.00552	0.9337
145	20.42	29	9.72288			145 To 150	0	362	0	1			29 To 30	7	345	0.01934	0.95304
150	9.16	30	4.6095			150 To 155	0	362	0	1			30 To 31	3	348	0.00829	0.96133
155	22.13	31	10.0014			155 To 160	0	362	0	1			31 To 32	3	351	0.00829	0.96961
160	19.32	32	8.98646			160 To 165	0	362	0	1			32 To 33	3	354	0.00829	0.9779
165	3.19	33	1.59844			165 To 170	0	362	0	1			33 To 34	0	354	0	0.9779
170	16.83	34	8.07737			170 To 175	0	362	0	1			34 To 35	1	355	0.00276	0.98066
175	12.85	35	6.49548			175 To 180	0	362	0	1			35 To 36	4	359	0.01105	0.99171
180	22	36	10.6126			180 To 185	0	362	0	1			36 To 37	0	359	0	0.99171
185	21.4	37	9.94932			185 To 190	0	362	0	1			37 To 38	0	359	0	0.99171
190	28.75	38	12.9417			190 To 195	0	362	0	1			38 To 39	0	359	0	0.99171
195	12.31	39	5.90181			195 To 200	0	362	0	1			39 To 40	1	360	0.00276	0.99448
200	16.7	40	8.16267			200 and over	0	362	0	1			40 To 41	1	361	0.00276	0.99724
	14.27	41	6.76624										41 To 42	0	361	0	0.99724
	14.53	42	7.07641										42 To 43	0	361	0	0.99724
	16.57	43	8.24419										43 To 44	0	361	0	0.99724
	14.63	44	7.31537										44 To 45	0	361	0	0.99724
	21.22	45	9.41062										45 To 46	0	361	0	0.99724
	12.35	46	6.37749										46 To 47	0	361	0	0.99724
	32.45	47	14.3909										47 To 48	0	361	0	0.99724
	27.23	48	11.4701										48 To 49	1	362	0.00276	1
	39.87	49	17.0319										49 To 50	0	362	0	1
	32.53	50	14.1472										50 To 51	0	362	0	1
	14.81	51	6.26375										51 To 52	0	362	0	1
	20.32	52	8.88112										52 To 53	0	362	0	1
	23.15	53	9.18687										53 To 54	0	362	0	1
	37.85	54	16.5747										54 To 55	0	362	0	1
	11.8	55	5.8309										55 To 56	0	362	0	1
	28.37	56	11.7606										56 To 57	0	362	0	1
	25.76	57	14.5594										57 To 58	0	362	0	1
	23.17	58	13.9941										58 To 59	0	362	0	1
	21.98	59	13.907										59 To 60	0	362	0	1
	19.32	60	11.2607										60 To 61	0	362	0	1
	24.19	61	14.3706										61 To 62	0	362	0	1
	30.55	62	14.2365										62 To 63	0	362	0	1
	32.85	63	15.8359										63 To 64	0	362	0	1
	23.87	64	13.6494										64 To 65	0	362	0	1
	51.03	65	23.4061										65 To 66	0	362	0	1
	22.37	66	12.2629										66 To 67	0	362	0	1
	16.18	67	10.7451										67 To 68	0	362	0	1
	27.95	68	17.0656										68 To 69	0	362	0	1
	29.33	69	17.9994										69 To 70	0	362	0	1
	37.24	70	20.8068
	12.56		8.4064
	21.25		13.6832
	14.82		9.07477
	11.19		7.4288
	20.64		12.1986
	11.86		6.96214
	29.46		15.0184
	23.24		12.0066
	12.05		7.73477
	18.81		10.5734
	19.43		9.40783
	21.85		10.4072
	27.21		13.4377
	11.69		6.27011
	8.42		4.76083
	43.33		21.716
	18.97		10.9717
	16.09		9.53934
	23.69		14.4179
	24.41		14.6598
	45.23		19.5962
	33.54		15.4037
	16.05		10.469
	23.19		14.6254
	22.02		12.5413
	44.44		24.8102
	33.85		20.5164
	36.74		20.7196
	34.38		19.1021
	35.48		19.721
	21.84		13.7853
	18.51		11.1011
	25.31		12.8275
	8.72		5.40775
	20.2		11.5402
	13.2		8.07488
	19.58		11.5217
	24.54		13.9345
	13.29		9.1146
	73.12		35.8344
	26.97		16.4853
	33.76		19.8506
	20.67		14.6057
	19.13		13.3795
	30.86		20.5665
	62.32		34.4424
	40.02		25.9314
	25.67		15.0161
	69.36		35.2941
	50.71		27.878
	19.84		12.0652
	36.25		21.0695
	32.22		19.0358
	37.75		21.0271
	26.03		15.8526
	29.35		18.1948
	17.79		10.4968
	31.52		17.179
	22.18		13.7961
	32.81		18.382
	31.64		16.8468
	29.55		17.8658
	32.37		20.1557
	19.6		12.5907
	21.43		14.9411
	31.14		18.9739
	17.41		12.9625
	19.83		13.7451
	27.77		17.8024
	17.53		11.675
	23.31		14.2831
	19.89		12.7288
	33.3		20.9896
	20.66		13.2131
	24.75		16.8597
	34.58		19.415
	31.46		20.4978
	23.86		16.6853
	31		19.7805
	17.12		11.7631
	20.58		13.867
	17.13		11.8081
	19.16		13.4466
	17.2		12.5273
	14.47		8.59876
	17.49		10.7923
	35.83		18.3706
	19.11		11.4397
	25		14.6964
	10.7		6.84669
	40.59		20.7028
	44.84		23.1815
	41.19		18.665
	9.08		5.80451
	15.11		9.66978
	20.71		12.1324
	38.74		20.8101
	18.79		10.5503
	9.73		5.93836
	13.71		8.55111
	23.89		13.6592
	11.89		7.58291
	11.22		7.05616
	21.8		12.7709
	18.12		11.1241
	8.77		5.73053
	18.52		11.5454
	23.29		14.9304
	20.5		13.0932
	21.01		13.1091
	22.23		14.0616
	9.18		5.11392
	29.17		17.9928
	20.84		11.9345
	16.9		9.91028
	24.89		11.4971
	10.5		6.11461
	10.12		7.00394
	13.92		9.84024
	15.46		10.3598
	25.12		15.8877
	18.8		10.0144
	12		6.94444
	9.27		6.59223
	6.79		5.03373
	54.36		22.8394
	99.05		35.6898
	63.96		25.0156
	75.77		27.3124
	63.5		26.3092
	50.98		24.9926
	77.37		31.2089
	101.95		40.6159
	33.04		12.6726
	52.96		23.6313
	60.51		26.6517
	48.42		24.8729
	61.63		29.221
	38.19		21.8929
	23.95		14.6501
	39.32		21.5157
	41.99		22.4569
	33.29		18.7697
	25.64		16.1695
	36.11		21.5094
	29.21		16.9216
	25.03		15.2529
	45.69		25.1638
	23.73		15.8443
	35.05		20.7802
	25.17		16.4445
	33.19		20.6869
	17.75		11.8318
	22.32		13.084
	37.04		22.3496
	32.15		20.4426
	58.35		27.4873
	46.01		20.458
	43.49		20.0433
	65.25		29.0762
	50.61		25.2167
	37.12		16.4481
	34.11		14.8848
	56.31		26.371
	72.85		31.2862
	60.7		27.276
	37.74		18.9059
	21.8		11.9054
	33.01		19.0567
	24.38		13.9778
	31.51		18.0801
	38.8		21.7708
	34.67		20.9183
	29.86		15.2916
	22.18		10.7279
	47.48		22.3952
	33.24		15.947
	20.04		10.6903
	37.63		19.8722
	59.31		25.6387
	47.7		22.1716
	53.02		25.4732
	42.28		18.6989
	38.55		18.9063
	44.32		19.8451
	28.74		14.4808
	38.69		17.9029
	15.45		8.3972
	34.28		16.0901
	38.35		17.4835
	48.47		23.8874
	49.13		23.0874
	19.62		10.2305
	23.07		12.5667
	44.13		20.2255
	52.93		24.1701
	45.35		22.5757
	28.67		14.1238
	13.34		7.62722
	13.92		7.07209
	24.12		13.549
	13.41		8.48144
	10.03		6.02728
	40.03		22.2117
	29.69		12.8706
	33.15		18.0104
	25.28		13.3165
	14.44		7.20271
	8.22		5.47781
	53.34		25.9904
	41.42		23.2906
	20.06		9.25277
	19.35		11.2363
	42.25		16.8649
	27.62		14.8622
	11.84		6.97949
	14.72		8.68385
	60.05		28.507
	28.45		15.3452
	39.2		21.999
	19.85		9.43038
	23.16		11.9845
	42.52		22.1274
	23.36		13.4176
	68.8		30.1068
	48.97		22.1443
	65.07		30.0208
	64.05		26.9593
	13.26		6.39931
	26.34		12.8576
	27.81		16.3406
	31.4		17.494
	12.96		7.50478
	45.58		22.3202
	92.93		32.4216
	49.33		22.3678
	103.47		32.9753
	65.17		29.701
	65.94		27.9525
	35.86		18.5113
	36.53		15.5374
	22.26		11.969
	39.15		18.5466
	102.73		39.8859
	13.37		7.59573
	18.56		11.2964
	21.63		12.1231
	23.18		12.2788
	70.94		31.3367
	27.91		17.1606
	31.61		18.3066
	22.95		13.8112
	44.81		25.0868
	34.31		16.8915
	38.47		19.9917
	18.44		9.8927
	22.66		12.4437
	42.85		20.6516
	24.72		13.9756
	26.7		15.1472
	21.71		12.2406
	25.07		14.5637
	44.37		24.8293
	18.5		10.0763
	18.71		10.6018
	41.17		21.5844
	64.69		32.7412
	77.22		35.0236
	40.67		17.3885
	44.8		23.9419
	129.25		48.6872
	48.25		24.7906
	57.97		29.8154
	26.37		16.0597
	32.2		17.6671
	41.56		23.4988
	25.9		14.2175
	24.16		13.2565
	32.03		15.9655
	65.48		29.5421
	32.97		15.8624
	60.66		30.4931
	45.69		21.9769
	65.95		29.2929
	64.71		28.6784
	46.23		23.1753
	21.26		12.1743
	12.35		7.10219
	57.49		29.9256
	42.49		23.0323
	52.97		27.1335
[truncated: 54 more columns]
