# Supplementary material for: Astrocyte GluN2C NMDA receptors control basal synaptic strengths of hippocampal CA1 pyramidal neurons in the stratum radiatum
Source: eLife journal article supplement (doi:10.7554/elife.70818), 2021-10-25
Supplement: supp [file elife_poa_e70818_Figure_5_source_data_1.xlsx]

## Sheet: Sheet1
		AVERAGE	SEM
ICS	Grin1	8.66885	3.70134
	Grin2a	143.802	74.6689
	Grin2b	0.617243	0
	Grin2c	29.4119	18.5369
N	Grin1	1364.07	155.045
	Grin2a	1383	474.38
	Grin2b	622.911	355.153
	Grin2c	198.858	93.5108
SR	Grin1	24.6506	11.3651
	Grin2a	87.408	15.9974
	Grin2b	26.846	10.4069
	Grin2c	661.332	304.17
SO	Grin1	60.2491	38.8763
	Grin2a	1.76416	0
	Grin2b	0.617243	0
	Grin2c	672.227	360.907
SLM	Grin1	162.945	101.898
	Grin2a	1.6167	0
	Grin2b	31.0162	30.399
	Grin2c	521.875	195.994
