# Supplementary figures and images for: Astrocyte GluN2C NMDA receptors control basal synaptic strengths of hippocampal CA1 pyramidal neurons in the stratum radiatum
Source: eLife journal article supplement (doi:10.7554/elife.70818), 2021-10-25

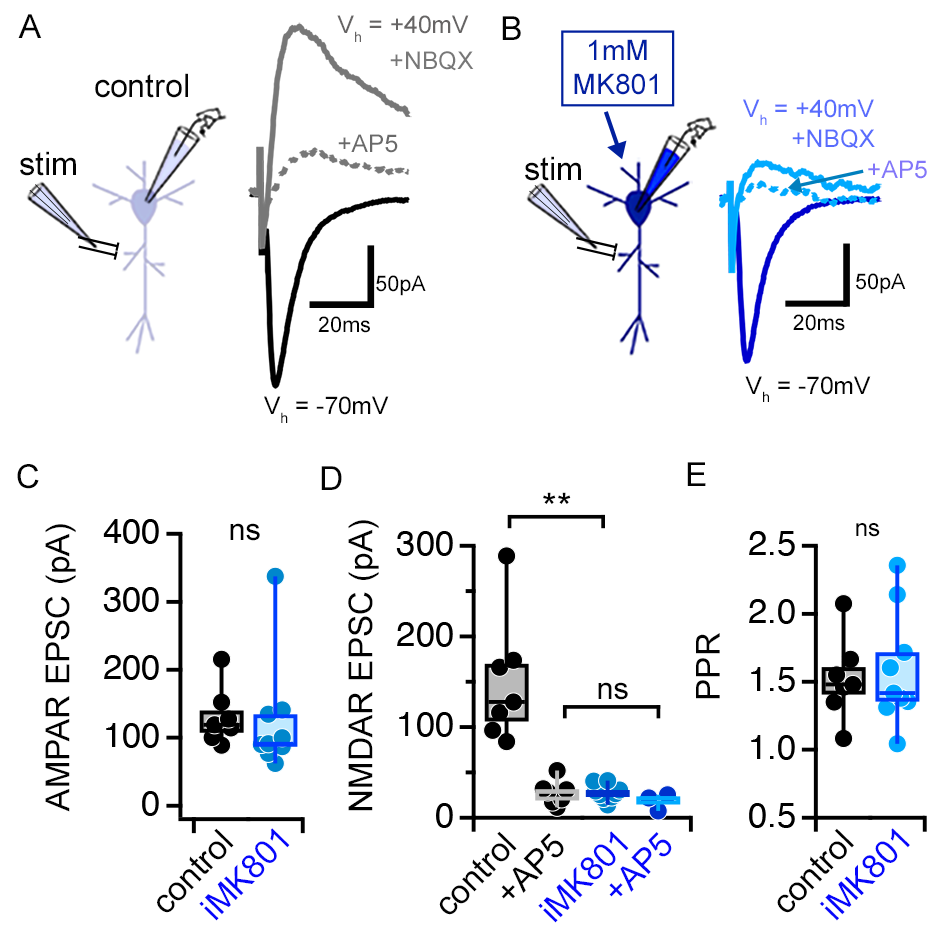

Supplement: supp [file elife-70818-supp-v1.zip › elife_poa_e70818_Figure_1_figure_supplement_1.tif]

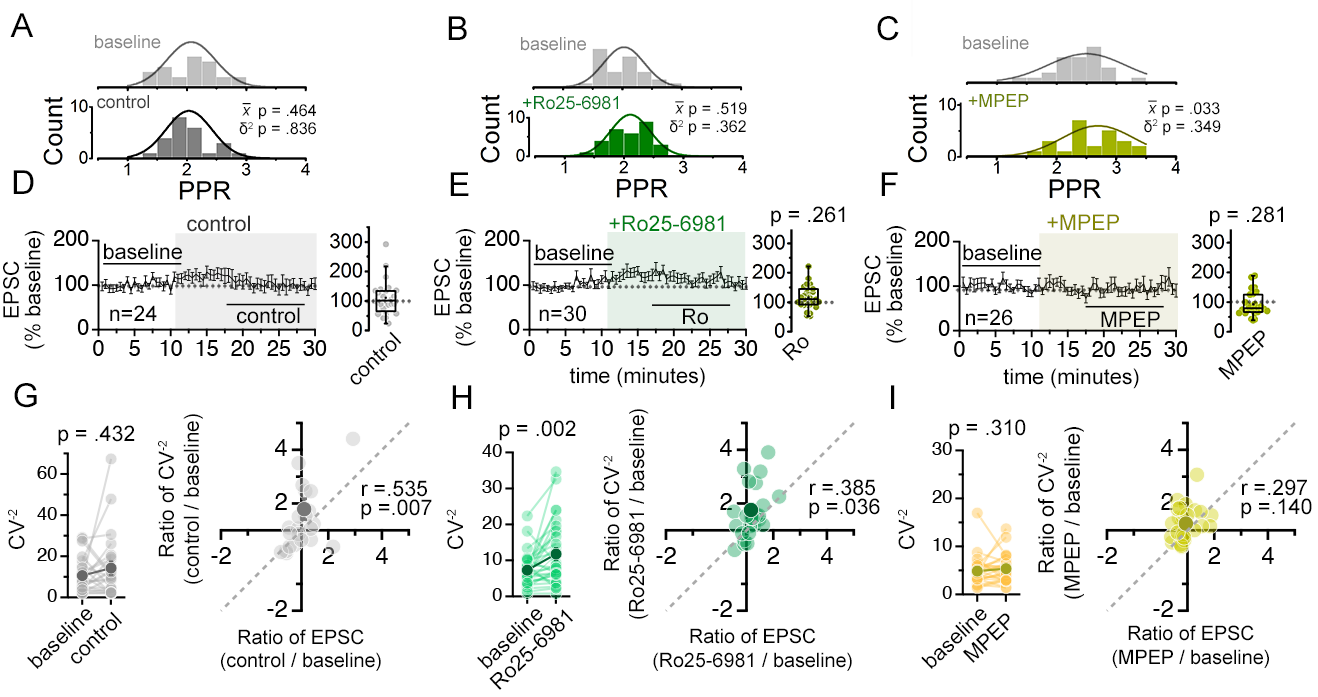

Supplement: supp [file elife-70818-supp-v1.zip › elife_poa_e70818_Figure_1_figure_supplement_2.tif]

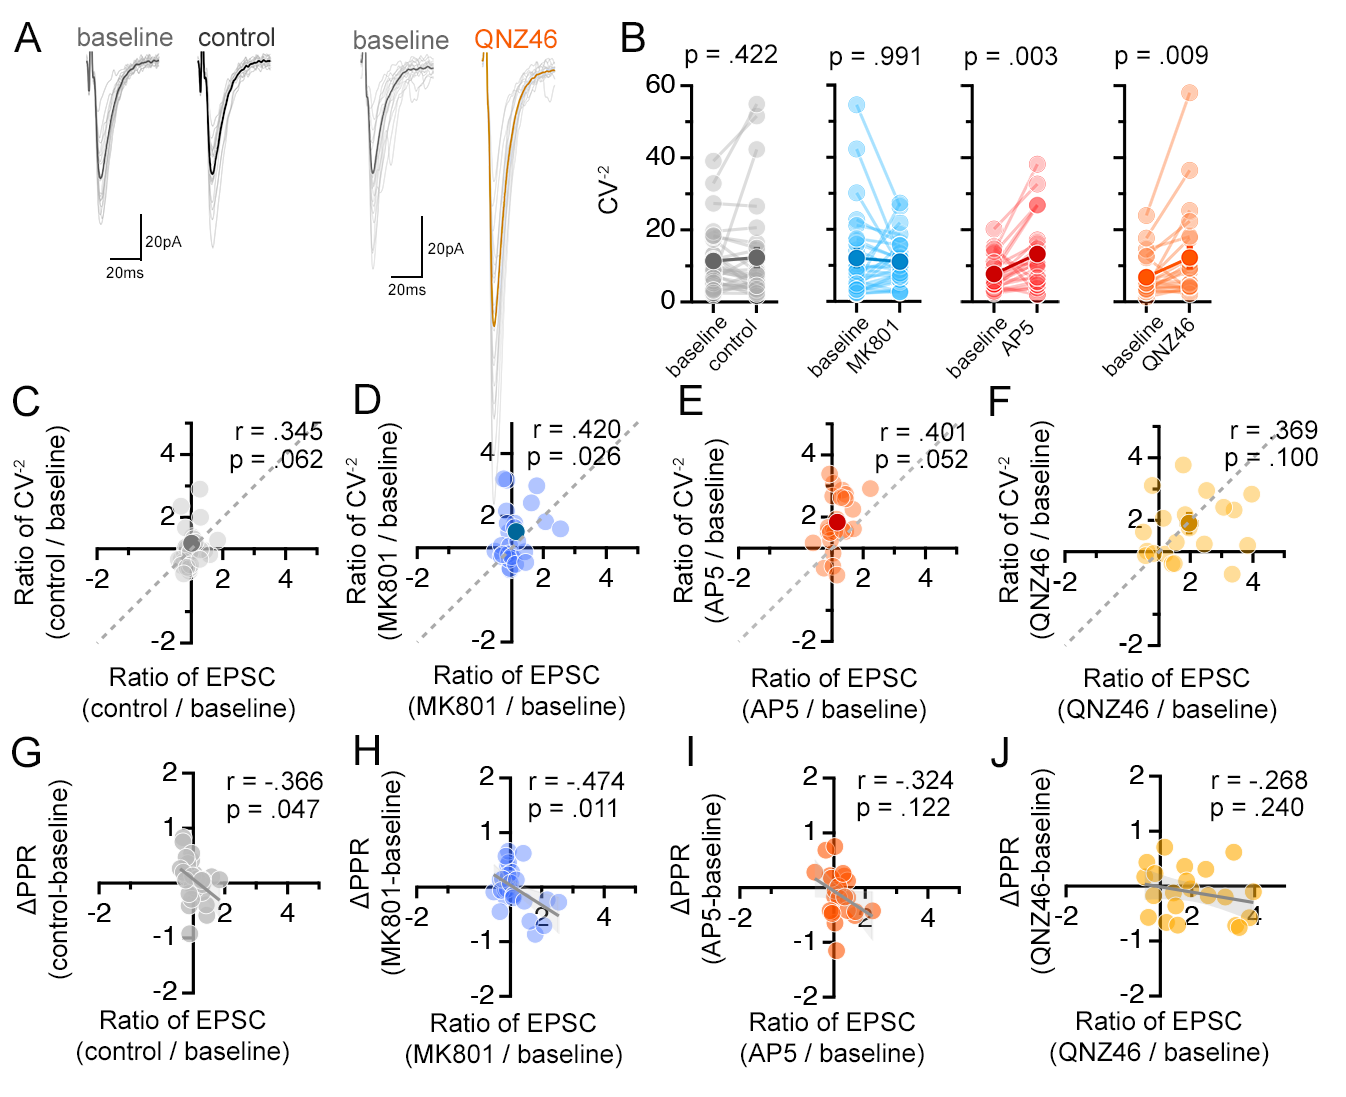

Supplement: supp [file elife-70818-supp-v1.zip › elife_poa_e70818_Figure_1_figure_supplement_3.tif]

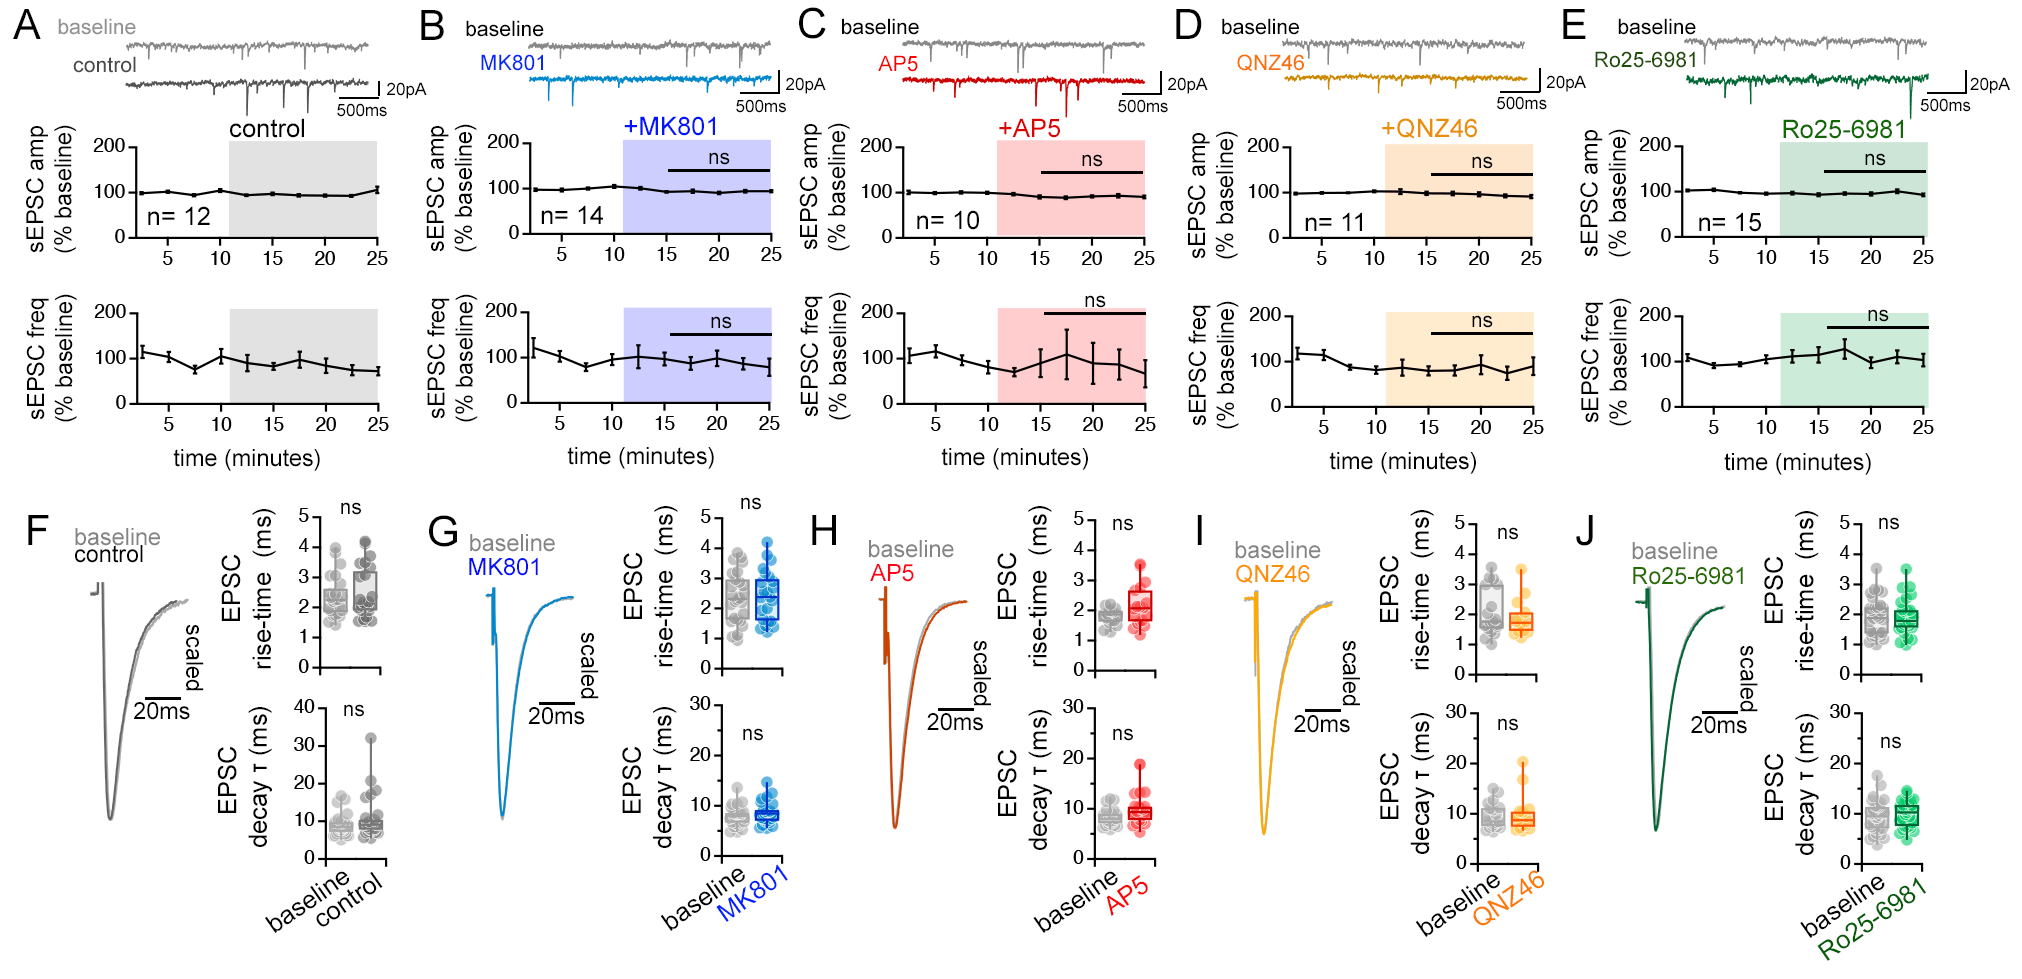

Supplement: supp [file elife-70818-supp-v1.zip › elife_poa_e70818_Figure_1_figure_supplement_4.tif]

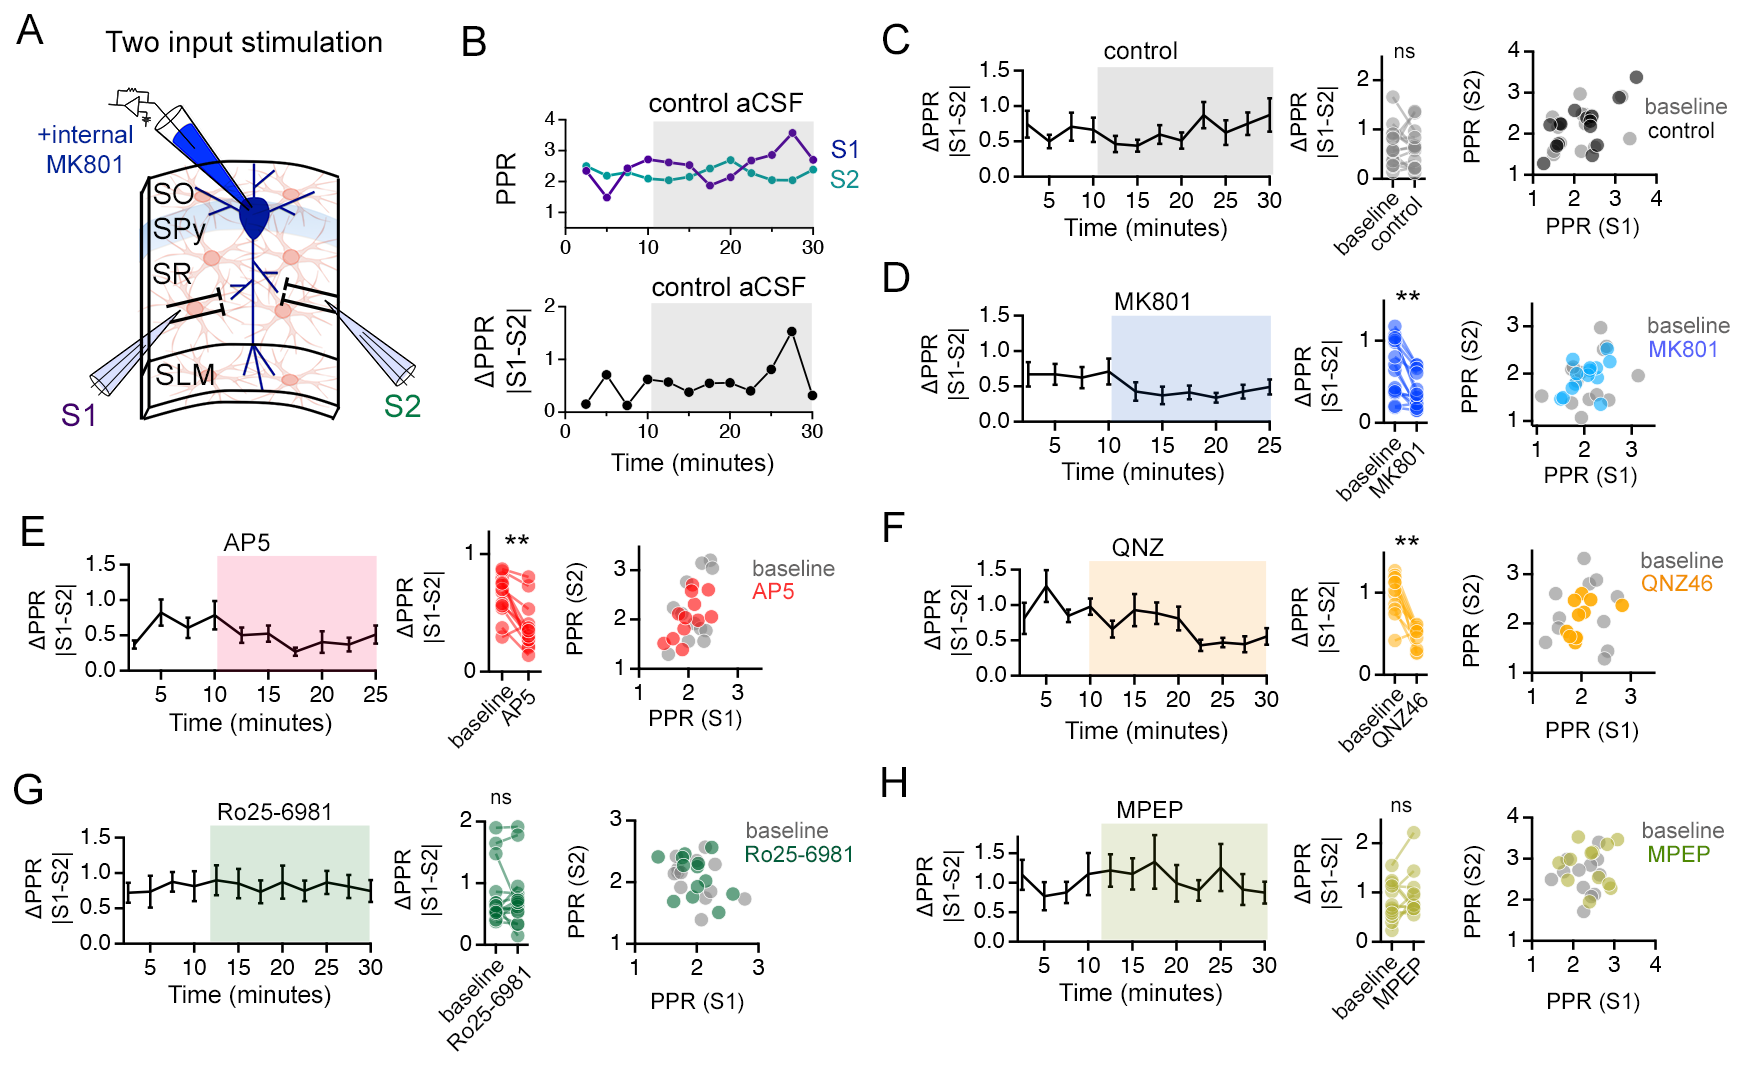

Supplement: supp [file elife-70818-supp-v1.zip › elife_poa_e70818_Figure_1_figure_supplement_5.tif]

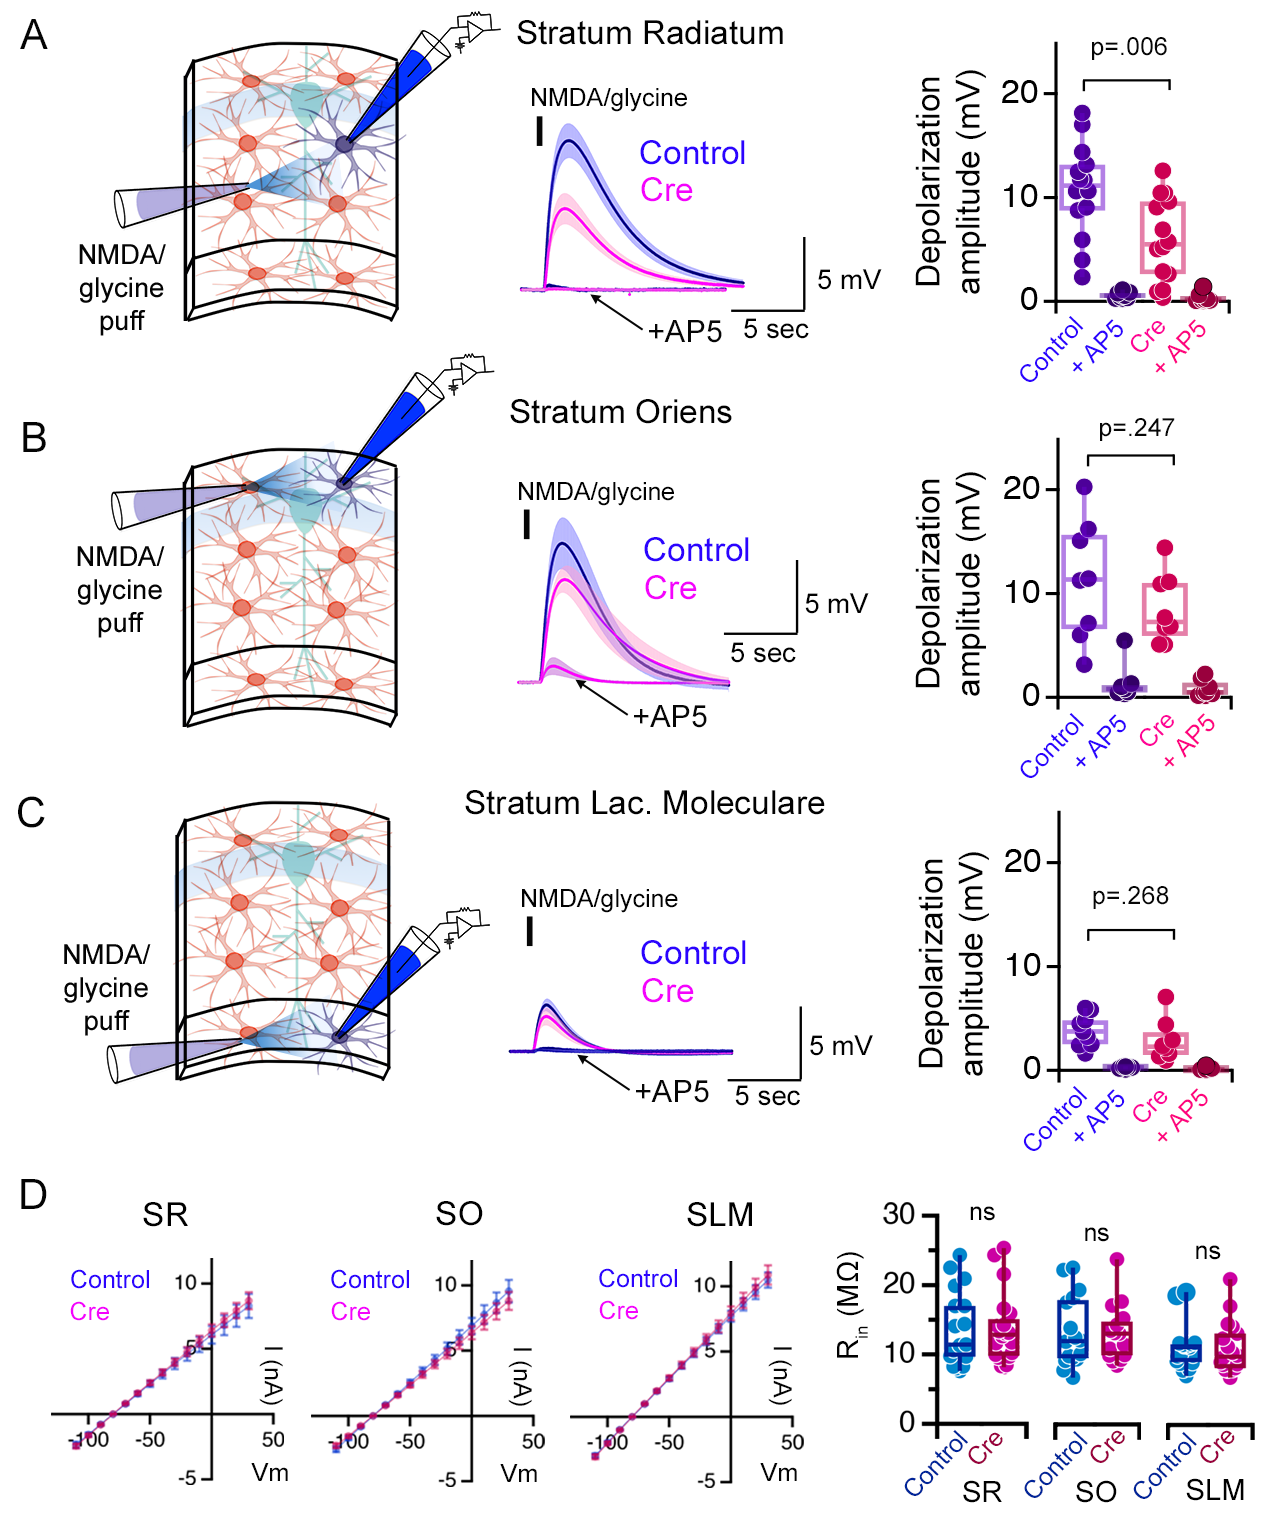

Supplement: supp [file elife-70818-supp-v1.zip › elife_poa_e70818_Figure_2_figure_supplement_1.tif]

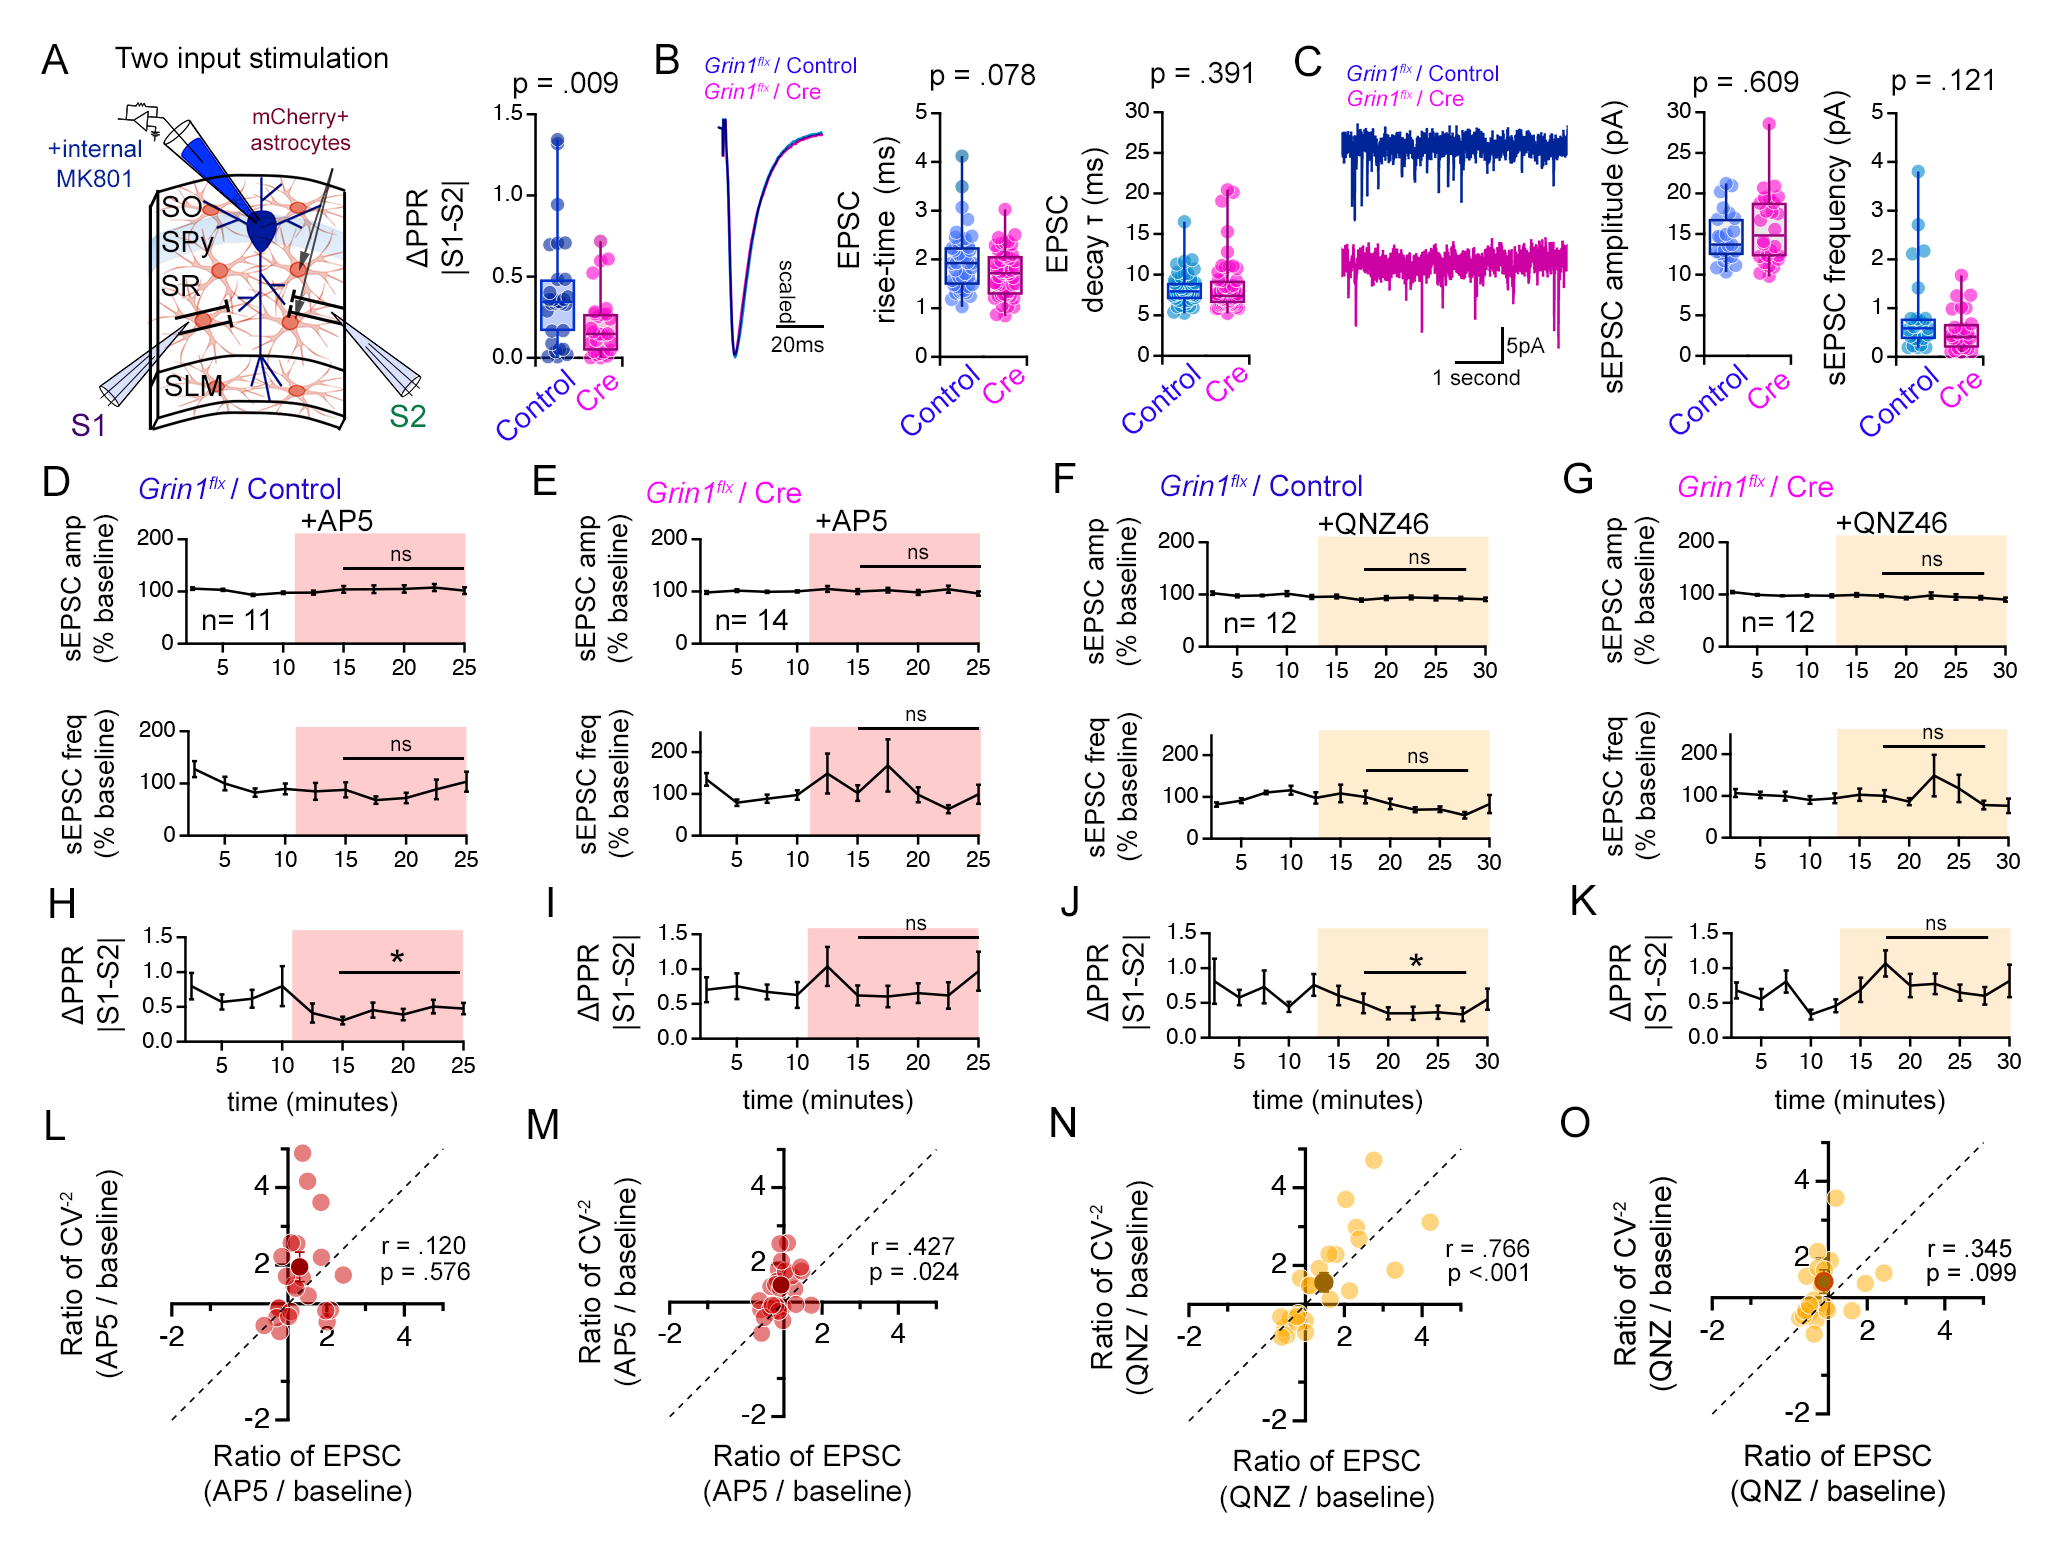

Supplement: supp [file elife-70818-supp-v1.zip › elife_poa_e70818_Figure_2_figure_supplement_2.tif]

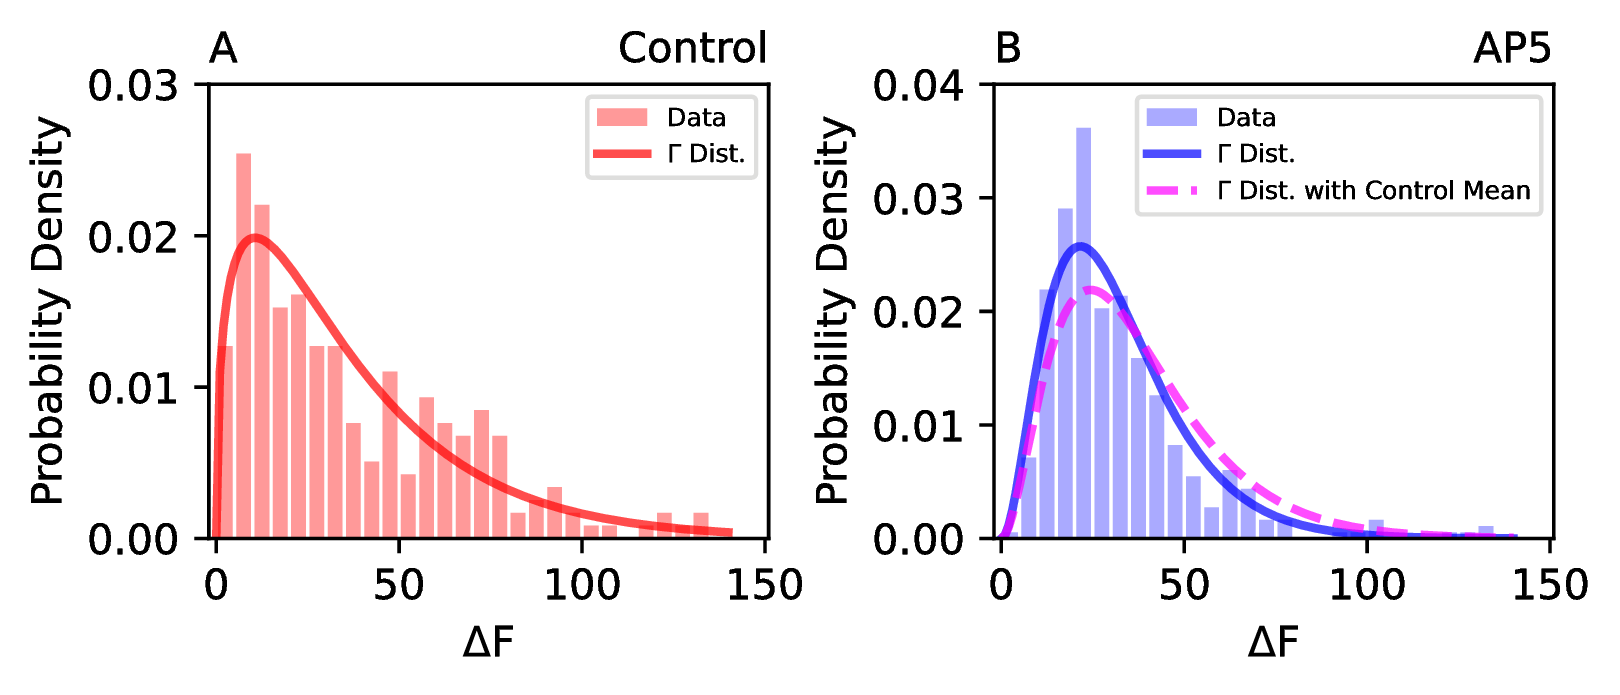

Supplement: supp [file elife-70818-supp-v1.zip › elife_poa_e70818_Figure_3_figure_supplement_1.tif]

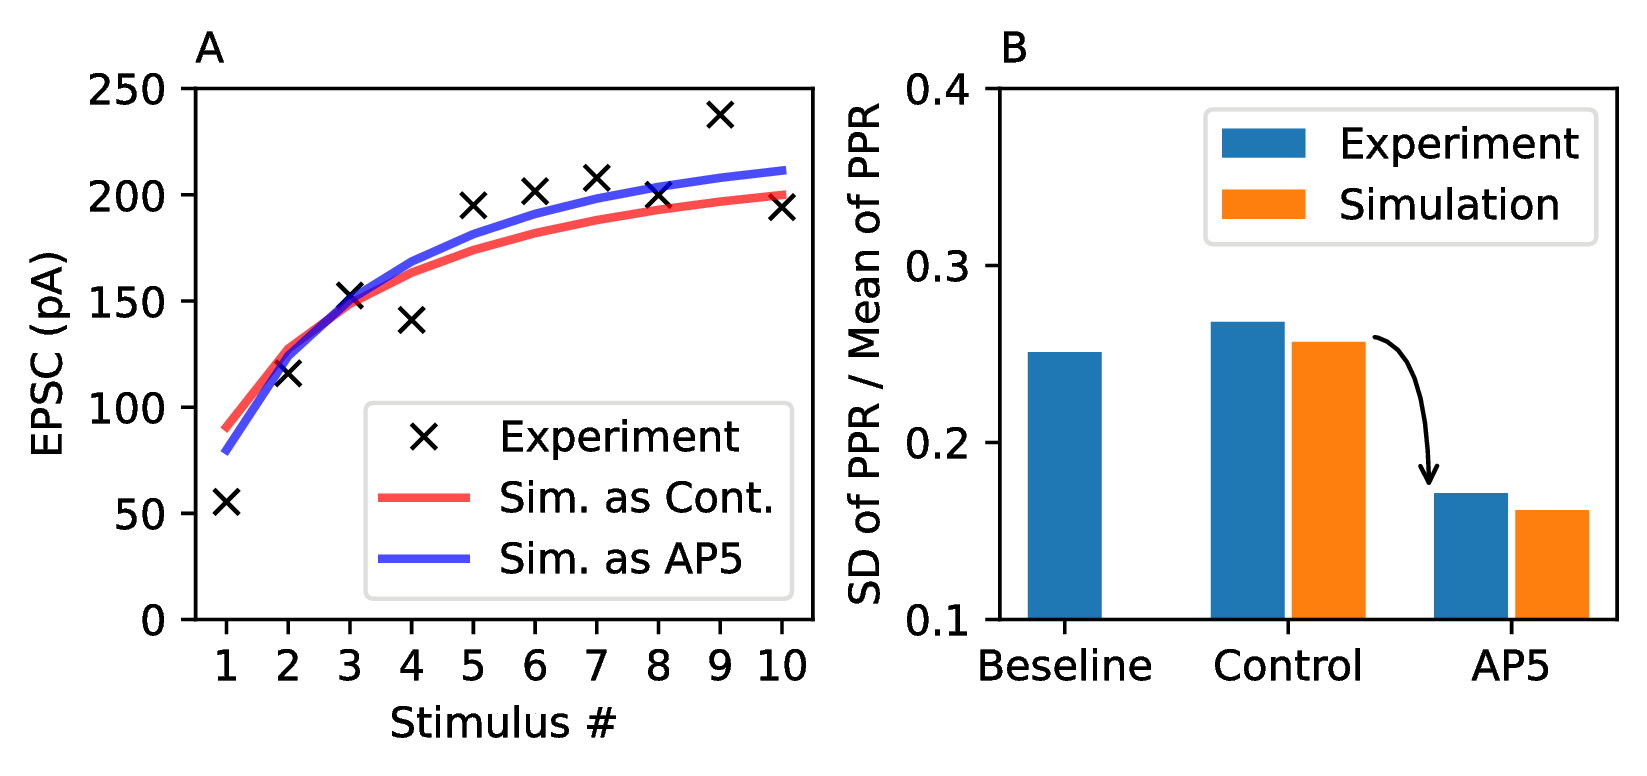

Supplement: supp [file elife-70818-supp-v1.zip › elife_poa_e70818_Figure_3_figure_supplement_2.tif]

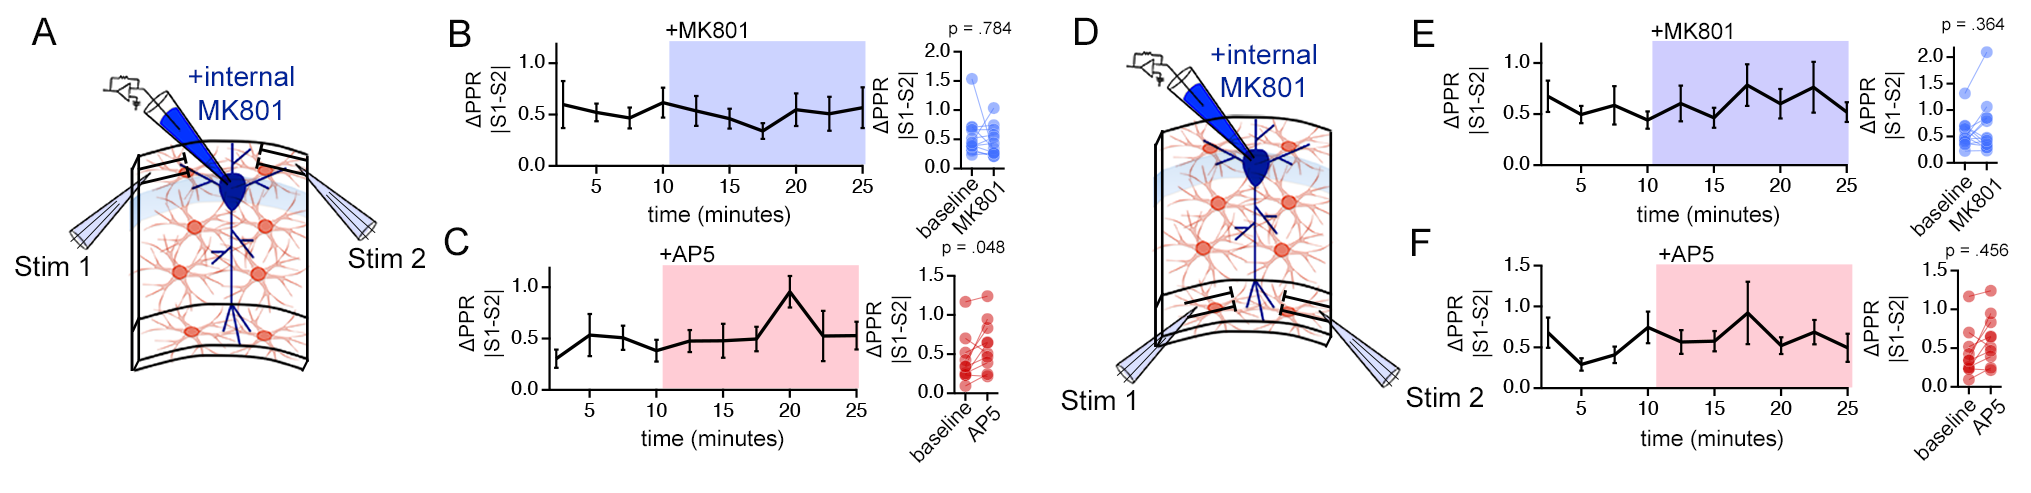

Supplement: supp [file elife-70818-supp-v1.zip › elife_poa_e70818_Figure_7_figure_supplement_1.tif]
